# Supplementary material
Source: PubMed Central journal article supplement (PMC4791575)
Supplement: id5b00136_si_001.pdf [file id5b00136_si_001.pdf]

## **SUPPORTING INFORMATION**

### **IDENTIFICATION OF “PREFERRED” HUMAN KINASE INHIBITORS FOR SLEEPING SICKNESS LEAD DISCOVERY. ARE SOME KINASES BETTER THAN OTHERS FOR INHIBITOR REPURPOSING?**

Emanuele Amata,<sup>a</sup> Hualin Xi,<sup>b</sup> Gonzalo Colmenarejo,<sup>c</sup> Rosario Gonzalez-Diaz,<sup>d</sup> Carlos Cordon-Obras,<sup>d</sup> Manuela Berlanga,<sup>c</sup> Pilar Manzano,<sup>c</sup> Jessey Erath,<sup>e</sup> Norma E. Roncal,<sup>g</sup> Patricia J. Lee,<sup>g</sup> Susan E. Leed,<sup>g</sup> Ana Rodriguez,<sup>e,f</sup> Richard J. Sciotti,<sup>g</sup> Miguel Navarro,<sup>d</sup> Michael P. Pollastri<sup>\*a</sup>

<sup>a</sup>Northeastern University Department of Chemistry & Chemical Biology, 360 Huntington Avenue, Boston, MA 02115 USA

<sup>b</sup>Pfizer Inc, Computational Sciences Center of Emphasis, 610 Main Street, Cambridge, MA 02140, USA

<sup>c</sup> Tres Cantos Medicines Development Campus, DDW and CIB, GlaxoSmithKline, 28760 Tres Cantos, Spain

<sup>d</sup> Consejo Superior de Investigaciones Científicas, Instituto de Parasitología y Biomedicina "López-Neyra", Granada 18100 Spain.

<sup>e</sup> New York University School of Medicine, Department of Microbiology, Division of Parasitology, 341 E. 25<sup>th</sup> St. New York, NY 10010 USA

<sup>f</sup> Anti-Infectives Screening Core, New York University School of Medicine, New York, NY 10010

<sup>g</sup> Experimental Therapeutics, Walter Reed Army Institute for Research, 2460 Linden Lane, Silver Spring, MD, 20910 USA

*\*Corresponding Author.* Michael P. Pollastri: 617-373-2703, [m.pollastri@neu.edu](mailto:m.pollastri@neu.edu).

|                           |     |
|---------------------------|-----|
| <b>Table of Contents</b>  |     |
| Supplementary data tables | S2  |
| Supplementary Figures     | S34 |
| References                | S38 |

**Table S1 – PKIS HTS Data**

| <b>Compound</b> | <b>Tbb pEC<sub>50</sub></b> | <b>Tbb %inh (Avg)</b> | <b>HepG2 pTC<sub>50</sub></b> | <b>Selectivity<br/>(pEC<sub>50</sub>-pTC<sub>50</sub>)</b> |
|-----------------|-----------------------------|-----------------------|-------------------------------|------------------------------------------------------------|
| GW778894X       | 8.1                         | 100.2                 | <4                            | >4.1                                                       |
| GSK571989A      | 7.8                         | 100.3                 | 5.1                           | 2.7                                                        |
| GSK326090A      | 7.8                         | 100.2                 | 5                             | 2.8                                                        |
| GW779439X       | 7.8                         | 100.0                 | 5                             | 2.8                                                        |
| GW396574X       | 7.5                         | 100.7                 | 5                             | 2.5                                                        |
| GW780056X       | 7.5                         | 100.0                 | <4                            | >3.5                                                       |
| GW806290X       | 7.2                         | 100.0                 | 5.3                           | 1.9                                                        |
| GW801372X       | 7.2                         | 99.5                  | <4                            | >3.2                                                       |
| GW305178X       | 7.1                         | 101.1                 | <4                            | >3.1                                                       |
| GSK579289A      | 7.1                         | 100.2                 | 4.9                           | 2.2                                                        |
| GW810576X       | 7.1                         | 99.9                  | <4                            | >3.1                                                       |
| GSK1173862A     | 7                           | 100.1                 | 5.3                           | 1.7                                                        |
| GSK2186269A     | 7                           | 99.8                  | 5.6                           | 1.4                                                        |
| GSK1007102B     | 6.9                         | 96.5                  | 5.8                           | 1.1                                                        |
| SB-732881-H     | 6.8                         | 100.0                 | 5.5                           | 1.3                                                        |
| GW837331X       | 6.8                         | 93.6                  | 4.3                           | 2.5                                                        |
| GSK1220512A     | 6.7                         | 100.2                 | 5.3                           | 1.4                                                        |
| GSK1751853A     | 6.7                         | 100.1                 | 5.3                           | 1.4                                                        |
| GW559768X       | 6.7                         | 100.0                 | 4.8                           | 1.9                                                        |
| GSK978744A      | 6.7                         | 100.0                 | <4                            | >2.7                                                       |
| GW784307A       | 6.6                         | 100.2                 | 4.8                           | 1.8                                                        |
| GW806742X       | 6.6                         | 100.1                 | 5.5                           | 1.1                                                        |
| SB-732881       | 6.6                         | 100.1                 | <4                            | >2.6                                                       |
| GSK237701A      | 6.6                         | 100.0                 | 4.1                           | 2.5                                                        |
| GSK2163632A     | 6.6                         | 99.9                  | 5.1                           | 1.5                                                        |
| GW416981X       | 6.6                         | 99.8                  | 4.4                           | 2.2                                                        |
| GW770220A       | 6.5                         | 100.5                 | 4.4                           | 2.1                                                        |
| GSK317315A      | 6.5                         | 100.3                 | 4.6                           | 1.9                                                        |
| GSK1713088A     | 6.5                         | 100.2                 | 5.3                           | 1.2                                                        |
| SB-220025-R     | 6.5                         | 99.8                  | <4                            | >2.5                                                       |
| GW297361X       | 6.5                         | 94.8                  | <4                            | >2.5                                                       |
| SB-725317       | 6.4                         | 100.5                 | 4.6                           | 1.8                                                        |
| SB-220025-A     | 6.4                         | 100.3                 | <4                            | >2.4                                                       |
| GSK317314A      | 6.4                         | 100.1                 | 4.4                           | 2                                                          |
| GW276655X       | 6.4                         | 99.9                  | <4                            | >2.4                                                       |
| GSK994854A      | 6.4                         | 96.1                  | 5.1                           | 1.3                                                        |
| GW784752X       | 6.4                         | 93.2                  | <4                            | >2.4                                                       |

|             |     |       |     |      |
|-------------|-----|-------|-----|------|
| SB-236687   | 6.3 | 100.3 | 4.2 | 2.1  |
| GSK718429A  | 6.3 | 100.1 | 4.8 | 1.5  |
| GW612286X   | 6.2 | 100.3 | 4.6 | 1.6  |
| GSK2110236A | 6.2 | 100.1 | 4.8 | 1.4  |
| GW572399X   | 6.2 | 99.9  | <4  | >2.2 |
| GW296115X   | 6.2 | 71.5  | 5.4 | 0.8  |
| GW583373A   | 6.2 | 59.3  | <4  | >2.2 |
| GW709042A   | 6.1 | 100.2 | 5.6 | 0.5  |
| GSK300014A  | 6.1 | 99.8  | <4  | >2   |
| SB-245392   | 6.1 | 99.8  | 5.1 | 1    |
| GW861893X   | 6.1 | 99.3  | <4  | >2.1 |
| SB-772077-B | 6.1 | 93.5  | <4  | >2.1 |
| GW644007X   | 6   | 100.3 | <4  | >2   |
| SB-675259-M | 6   | 100.0 | <4  | >2   |
| SB-220455   | 6   | 99.9  | <4  | >2   |
| GW827106X   | 6   | 78.1  | <4  | >2   |
| SB-376719   | 5.9 | 100.1 | <4  | >1.9 |
| SB-223133   | 5.9 | 100.1 | <4  | >1.9 |
| SB-734117   | 5.9 | 88.2  | 4.3 | 1.6  |
| GW406108X   | 5.9 | 87.7  | 4.4 | 1.5  |
| GW768505A   | 5.8 | 100.5 | 6.3 | -0.5 |
| GW280670X   | 5.8 | 100.2 | 4.7 | 1.1  |
| SB-226879   | 5.8 | 99.2  | <4  | >1.8 |
| GSK1326255A | 5.8 | 96.7  | 4.3 | 1.5  |
| GW513184X   | 5.8 | 94.8  | <4  | >1.8 |
| GW275944X   | 5.8 | 83.1  | 4.5 | 1.3  |
| GSK2213727A | 5.8 | 81.7  | <4  | >1.8 |
| GW827102X   | 5.8 | 66.8  | <4  | >1.8 |
| GW627834A   | 5.8 | 63.9  | 4.7 | 1.1  |
| GW615311X   | 5.8 | 58.3  | <4  | >1.8 |
| GW784684X   | 5.7 | 99.7  | 4.8 | 0.9  |
| GW795486X   | 5.7 | 99.3  | 5.4 | 0.3  |
| SB-242719   | 5.7 | 97.7  | 4.9 | 0.8  |
| GW621823A   | 5.7 | 96.6  | <4  | >1.7 |
| GW429374A   | 5.7 | 85.1  | 4.5 | 1.2  |
| GW700494A   | 5.7 | 84.7  | 4.7 | 1    |
| GW869810X   | 5.7 | 83.7  | 4.3 | 1.4  |
| SB-390527   | 5.7 | 78.3  | <4  | >1.7 |
| GSK259178A  | 5.7 | 77.9  | 4.3 | 1.4  |
| GW810372X   | 5.7 | 74.0  | <4  | >1.7 |
| GW576609A   | 5.7 | 59.7  | <4  | >1.7 |

|              |                 |       |     |      |
|--------------|-----------------|-------|-----|------|
| GW576484X    | 5.7             | 53.4  | 4.8 | 0.9  |
| GW567808A    | 5.7             | 51.6  | 4.4 | 1.3  |
| SB-253226    | 5.6             | 99.5  | 4.8 | 0.8  |
| GW618013A    | 5.6             | 99.1  | 4.6 | 1    |
| GW829906X    | 5.6             | 80.6  | 4.3 | 1.3  |
| GW683134A    | 5.6             | 72.5  | 5   | 0.6  |
| SB-739245-AC | 5.6             | 64.8  | 4.7 | 0.9  |
| GW442130X    | 5.6             | 60.8  | 4.2 | 1.4  |
| GSK938890A   | 5.6             | 58.6  | 4.2 | 1.4  |
| GW770249A    | 5.6             | 53.8  | 6.4 | -0.8 |
| GW799251X    | 5.5             | 79.7  | 4.4 | 1.1  |
| GW569530A    | 5.5             | 77.0  | <4  | >1.5 |
| GSK943949A   | 5.5             | 56.1  | 4.7 | 0.8  |
| GW654652C    | 5.5             | 56.1  | <4  | >1.5 |
| GSK270822A   | 5.4             | 37.3  | 4.3 | 1.1  |
| GW771127A    | 5.3             | 70.5  | 4.5 | 0.8  |
| GSK317354A   | 5.3             | 43.6  | <4  | >1.3 |
| GW831091X    | 5.2             | 69.8  | <4  | >1.3 |
| GW809897X    | 5.1             | 54.5  | 4.3 | 0.8  |
| GW856804X    | 5               | 81.8  | 4.3 | 0.7  |
| GW589933X    | 4.9             | 53.3  | <4  | >0.9 |
| GSK953913A   | 4.7             | 55.0  | <4  | >0.7 |
| GW405841X    | 4.6             | 49.4  | <4  | >0.6 |
| GSK299115A   | 4.6             | 42.3  | <4  | >0.6 |
| GW814408X    | ND <sup>a</sup> | 100.2 |     |      |
| GW680191X    | ND <sup>a</sup> | 99.8  |     |      |
| GW805758X    |                 | 96.0  | 5.6 |      |
| GW852849X    |                 | 89.0  | <4  |      |
| GSK269962B   |                 | 85.0  | 4.6 |      |
| SB-686709-A  |                 | 80.4  | 4.7 |      |
| GW876790X    |                 | 67.9  | <4  |      |
| GW708336X    |                 | 67.5  | 4.6 |      |
| GW811168X    |                 | 67.3  | <4  |      |
| GW575533A    |                 | 53.0  | <4  |      |
| SB-476429-A  |                 | 50.8  | 4.7 |      |
| GSK466317A   |                 | 49.8  |     |      |
| SB-400868-A  |                 | 49.6  |     |      |
| SB-736302    |                 | 49.5  |     |      |
| GW566221A    |                 | 48.7  |     |      |
| GW627512B    |                 | 48.6  |     |      |
| SB-278538    |                 | 48.0  |     |      |

|               |  |      |     |  |
|---------------|--|------|-----|--|
| GW278681X     |  | 46.6 |     |  |
| GW301784X     |  | 46.5 |     |  |
| GW827099X     |  | 45.7 |     |  |
| GW335962X     |  | 45.7 |     |  |
| SB-750140     |  | 45.6 |     |  |
| GW795493X     |  | 45.1 |     |  |
| GW574783B     |  | 44.9 |     |  |
| GW416469X     |  | 44.2 |     |  |
| GW568377A     |  | 43.6 |     |  |
| SB-253228     |  | 42.6 |     |  |
| GW643971X     |  | 42.5 |     |  |
| SB-409514     |  | 41.4 |     |  |
| GW458787A     |  | 39.8 | 4.3 |  |
| GW580496A     |  | 39.3 |     |  |
| GSK1030061A   |  | 39.3 |     |  |
| GW576924A     |  | 39.2 |     |  |
| SB-590885-AAD |  | 38.5 | 6.1 |  |
| GW284408X     |  | 38.2 |     |  |
| GW574782A     |  | 38.2 |     |  |
| GW673715X     |  | 37.9 |     |  |
| GSK614526A    |  | 37.7 |     |  |
| GW300653X     |  | 37.7 |     |  |
| SB-682330-A   |  | 37.4 |     |  |
| SB-437013     |  | 37.3 |     |  |
| GW833373X     |  | 37.1 |     |  |
| SB-221466     |  | 36.8 |     |  |
| GSK2220400A   |  | 35.3 |     |  |
| GW694590A     |  | 34.6 |     |  |
| GSK204925A    |  | 34.4 |     |  |
| GW759710A     |  | 33.1 |     |  |
| GW578748X     |  | 32.3 |     |  |
| GW633459A     |  | 31.8 |     |  |
| SB-251505     |  | 31.7 |     |  |
| GW589961A     |  | 31.1 |     |  |
| GW290597X     |  | 30.7 |     |  |
| SB-278539     |  | 30.2 |     |  |
| GSK3206866B   |  | 30.1 |     |  |
| GW549034X     |  | 30.1 |     |  |
| GW651576X     |  | 29.9 |     |  |
| GW561436X     |  | 29.9 |     |  |
| GW782612X     |  | 29.7 |     |  |

|              |  |      |     |  |
|--------------|--|------|-----|--|
| GW301888X    |  | 29.4 | 4.3 |  |
| GSK1511931A  |  | 29.3 |     |  |
| SB-284847-BT |  | 29.2 |     |  |
| GW575808A    |  | 28.3 |     |  |
| GW282536X    |  | 28.0 |     |  |
| GSK200398A   |  | 27.6 |     |  |
| GSK237700A   |  | 27.4 |     |  |
| GW830263A    |  | 26.7 |     |  |
| GW305074X    |  | 26.5 |     |  |
| GW284372X    |  | 25.4 |     |  |
| GW572401X    |  | 25.4 |     |  |
| GW827105X    |  | 24.6 |     |  |
| GW581744X    |  | 24.4 |     |  |
| GW772405X    |  | 24.3 |     |  |
| SB-250715    |  | 23.8 |     |  |
| GI261520A    |  | 23.6 |     |  |
| GSK238063A   |  | 23.5 |     |  |
| GW282974X    |  | 23.2 |     |  |
| GW813360X    |  | 23.2 |     |  |
| GW282449A    |  | 23.0 |     |  |
| GW831090X    |  | 22.9 | <4  |  |
| GW804482X    |  | 22.7 |     |  |
| GW819077X    |  | 22.4 |     |  |
| GSK619487A   |  | 21.9 |     |  |
| SB-698596-AC |  | 21.7 |     |  |
| GSK238583A   |  | 21.4 |     |  |
| GW301789X    |  | 21.4 |     |  |
| GW824645A    |  | 21.2 |     |  |
| GSK182497A   |  | 21.1 |     |  |
| SB-678557-A  |  | 20.3 |     |  |
| GW607049C    |  | 20.1 |     |  |
| GW569293E    |  | 19.9 |     |  |
| GW770249X    |  | 19.8 |     |  |
| GW279320X    |  | 19.8 |     |  |
| GW775608X    |  | 18.6 |     |  |
| GW693881A    |  | 18.6 |     |  |
| GW275616X    |  | 18.4 |     |  |
| GSK192082A   |  | 18.4 |     |  |
| GW300657X    |  | 18.2 |     |  |
| SB-431542-A  |  | 18.1 |     |  |
| SB-711237    |  | 17.8 |     |  |

|             |  |      |      |  |
|-------------|--|------|------|--|
| GW684626B   |  | 17.7 |      |  |
| GSK248233A  |  | 17.5 |      |  |
| SB-738482   |  | 17.5 |      |  |
| GW461104A   |  | 16.8 |      |  |
| SB-347804   |  | 16.2 |      |  |
| SB-735465   |  | 16.2 |      |  |
| SB-242721   |  | 16.2 |      |  |
| GW439255X   |  | 16.1 |      |  |
| SB-742865   |  | 16.1 |      |  |
| GW693917A   |  | 15.8 |      |  |
| GW406731X   |  | 15.7 |      |  |
| GW832467X   |  | 15.7 |      |  |
| GW683109X   |  | 15.6 |      |  |
| GW621970X   |  | 15.4 |      |  |
| GW695874X   |  | 15.4 |      |  |
| GSK312948A  |  | 15.4 |      |  |
| GW809885X   |  | 15.3 |      |  |
| GSK635416A  |  | 15.2 |      |  |
| GW616030X   |  | 15.0 |      |  |
| GW659386A   |  | 14.8 |      |  |
| GW683768X   |  | 14.3 |      |  |
| GW701427A   |  | 14.2 |      |  |
| GW580509X   |  | 14.0 |      |  |
| GW659893X   |  | 14.0 |      |  |
| GR105659X   |  | 13.8 |      |  |
| GW694234A   |  | 13.8 |      |  |
| GW642138X   |  | 13.7 |      |  |
| GW622055X   |  | 13.7 |      |  |
| GSK319347A  |  | 13.5 |      |  |
| GW434756X   |  | 13.2 |      |  |
| GW435821X   |  | 12.9 |      |  |
| GSK2219385A |  | 12.7 |      |  |
| SB-251527   |  | 12.6 |      |  |
| GW445012X   |  | 12.4 |      |  |
| SB-735467   |  | 12.3 |      |  |
| SB-239272   |  | 12.2 | >8.8 |  |
| GW432441X   |  | 12.2 |      |  |
| GW632046X   |  | 11.6 |      |  |
| GW683003X   |  | 11.3 |      |  |
| GW632580X   |  | 11.2 | 4.3  |  |
| GW785804X   |  | 11.2 |      |  |

|               |  |      |     |  |
|---------------|--|------|-----|--|
| GW734508X     |  | 11.2 |     |  |
| GW641155A     |  | 11.1 |     |  |
| SB-409513     |  | 11.0 |     |  |
| GW830365A     |  | 10.9 |     |  |
| GW820759X     |  | 10.7 |     |  |
| GW678313X     |  | 10.6 |     |  |
| SB-633825     |  | 10.6 |     |  |
| GW829115X     |  | 10.5 |     |  |
| GW703087X     |  | 10.3 |     |  |
| GW807930X     |  | 10.3 |     |  |
| SB-264866     |  | 10.2 |     |  |
| GW711782X     |  | 10.0 |     |  |
| GSK969786A    |  | 10.0 | <4  |  |
| SB-744941     |  | 10.0 |     |  |
| SB-210313     |  | 9.9  |     |  |
| SB-742864     |  | 9.7  |     |  |
| SB-657836-AAA |  | 9.7  |     |  |
| GW830900A     |  | 9.5  |     |  |
| GW743024X     |  | 9.3  | 4.7 |  |
| SB-610251-B   |  | 9.3  |     |  |
| GSK620503A    |  | 9.3  |     |  |
| GW682841X     |  | 9.1  |     |  |
| GSK466314A    |  | 9.1  |     |  |
| SB-630812     |  | 9.0  | <4  |  |
| GW829055X     |  | 9.0  |     |  |
| GW827396X     |  | 8.7  |     |  |
| SB-264865     |  | 8.4  |     |  |
| SKF-62604     |  | 8.2  |     |  |
| GW829877X     |  | 8.1  |     |  |
| GW781673X     |  | 8.0  |     |  |
| SB-759335-B   |  | 7.9  |     |  |
| SB-614067-R   |  | 7.9  |     |  |
| GSK561866B    |  | 7.8  |     |  |
| GW607117X     |  | 7.7  |     |  |
| SKF-86002-A2  |  | 7.7  |     |  |
| GW631581B     |  | 7.6  |     |  |
| GW679410X     |  | 7.4  |     |  |
| SB-751148     |  | 7.3  |     |  |
| GSK1030059A   |  | 7.1  |     |  |
| SB-360741     |  | 6.8  |     |  |
| GW769076X     |  | 6.7  |     |  |



|             |  |     |    |  |
|-------------|--|-----|----|--|
| GW410563A   |  | 6.6 |    |  |
| SB-361058   |  | 6.4 |    |  |
| GSK1023156A |  | 6.3 |    |  |
| GW817394X   |  | 6.2 |    |  |
| GW782907X   |  | 6.0 |    |  |
| SB-741905   |  | 6.0 |    |  |
| SB-739452   |  | 6.0 |    |  |
| GW846105X   |  | 5.9 | <4 |  |
| GW796921X   |  | 5.9 |    |  |
| GW794726X   |  | 5.8 |    |  |
| GW785974X   |  | 5.8 |    |  |
| SB-242718   |  | 5.7 |    |  |
| GW794607X   |  | 5.6 |    |  |
| GSK605714A  |  | 5.5 |    |  |
| GSK625137A  |  | 5.2 |    |  |
| SB-390523   |  | 5.2 |    |  |
| GW786460X   |  | 5.2 |    |  |
| GW853609X   |  | 5.1 |    |  |
| GW549390X   |  | 5.1 |    |  |
| GW811761X   |  | 4.9 |    |  |
| GW572738X   |  | 4.9 |    |  |
| GSK1030058A |  | 4.8 |    |  |
| GW780159X   |  | 4.7 |    |  |
| GW300660X   |  | 4.7 |    |  |
| SB-736290   |  | 4.7 |    |  |
| GW445014X   |  | 4.6 |    |  |
| GW441756X   |  | 4.4 |    |  |
| SB-254169   |  | 4.4 |    |  |
| SB-216385   |  | 4.4 |    |  |
| GW843682X   |  | 4.3 |    |  |
| GW807982X   |  | 4.1 |    |  |
| GSK1392956A |  | 4.1 |    |  |
| SB-738561   |  | 3.9 |    |  |
| GW829874X   |  | 3.8 |    |  |
| SB-732941   |  | 3.4 |    |  |
| SB-431533   |  | 3.3 |    |  |
| GSK586581A  |  | 3.3 |    |  |
| GW874091X   |  | 3.2 |    |  |
| GW445017X   |  | 3.1 |    |  |
| GSK1000163A |  | 3.0 |    |  |
| GW427984X   |  | 2.7 |    |  |

|             |  |       |     |  |
|-------------|--|-------|-----|--|
| SB-358518   |  | 2.5   |     |  |
| GW407323A   |  | 2.4   |     |  |
| GW785404X   |  | 2.0   |     |  |
| GW577921A   |  | 1.7   |     |  |
| GSK180736A  |  | 1.7   |     |  |
| GW853606X   |  | 1.6   | 4.4 |  |
| GSK949675A  |  | 1.2   |     |  |
| SB-751399   |  | 0.9   |     |  |
| GW796920X   |  | 0.8   |     |  |
| GW445015X   |  | 0.6   |     |  |
| GW459057A   |  | 0.5   |     |  |
| GW680908A   |  | 0.5   |     |  |
| GW782912X   |  | 0.1   |     |  |
| GSK711701A  |  | 0.1   |     |  |
| GSK1030062A |  | 0.1   |     |  |
| SB-242717   |  | 0.0   |     |  |
| GW828525X   |  | -0.2  |     |  |
| GW693481X   |  | -0.3  |     |  |
| GW708893X   |  | -0.4  |     |  |
| GR269666A   |  | -0.8  |     |  |
| SB-814597   |  | -0.9  |     |  |
| GW642125X   |  | -1.0  |     |  |
| GW568326X   |  | -1.4  |     |  |
| SB-285234-W |  | -1.6  |     |  |
| GSK980961A  |  | -1.8  | 4.1 |  |
| GW620972X   |  | -2.1  |     |  |
| GW680975X   |  | -2.1  |     |  |
| GW441806A   |  | -2.2  |     |  |
| GW701032X   |  | -2.3  |     |  |
| GW806776X   |  | -2.6  |     |  |
| GW817396X   |  | -2.7  |     |  |
| GW819230X   |  | -2.8  |     |  |
| SB-743899   |  | -3.1  |     |  |
| GSK554170A  |  | -3.1  |     |  |
| GW450241X   |  | -3.8  |     |  |
| SB-333612   |  | -5.2  |     |  |
| GSK1819799A |  | -5.7  |     |  |
| GW828529X   |  | -6.6  |     |  |
| GW458344A   |  | -6.9  |     |  |
| SB-737198   |  | -9.5  |     |  |
| SKF-86055   |  | -10.9 |     |  |

<sup>a</sup> ND=pEC50 data not obtained.

**Table S2.** Structures of purchased inhibitors of preferred kinases selected for purchase and screening, with *T. brucei* potency data.

| #  | NEU      | Name         | Tbb pEC50 | SMILES                                                                                                                                |
|----|----------|--------------|-----------|---------------------------------------------------------------------------------------------------------------------------------------|
| 1  | NEU-838  | Crizotinib   | 6.36      | <chem>C[C@@H](OC1=CC(=CN=C1N)C1=CN(N=C1)C1CCNCC1)C1=C(Cl)C=CC(F)=C1Cl</chem>                                                          |
| 2  | NEU-844  | TAE684       | 7.00      | <chem>COC1=CC(=CC=C1NC1=NC=C(Cl)C(NC2=CC=CC=C2S(=O)(=O)C(C)C)=N1)N1CCC(CC1)N1CCN(C)CC1</chem>                                         |
| 3  | NEU-893  | GSK1838705A  | 5.70      | <chem>CNC(=O)C1=C(NC2=C3C=CNC3=NC(NC3=CC4=C(CCN4C(=O)CN(C)C)C=C3OC)=N2)C=CC=C1F</chem>                                                |
| 4  | NEU-967  | NVP-AEW541   | 5.74      | <chem>NC1=C2C(=CN([C@@H]3C[C@H](CN4CCC4)C3)C2=NC=N1)C1=CC(OCC2=CC=CC=C2)=CC=C1</chem>                                                 |
| 5  | NEU-968  | BMS-265246   | 6.34      | <chem>CCCCOC1=C2C=NNC2=NC=C1C(=O)C1=C(F)C=C(C)C=C1F</chem>                                                                            |
| 6  | NEU-969  | PHA-848125   | 7.57      | <chem>CNC(=O)C1=NN(C)C2=C1C(C)(C)CC1=CN=C(NC3=CC=C(C=C3)N3CCN(C)CC3)N=C21</chem>                                                      |
| 7  | NEU-970  | GSK1904529A  | 5.86      | <chem>CCC1=CC(NC2=NC=CC(=N2)C2=C(N=C3C=CC=CN23)C2=CC(C(=O)NC3=C(F)C=CC=C3F)=C(OC)C=C2)=C(OC)C=C1N1CCC(CC1)N1CCN(CC1)S(C)(=O)=O</chem> |
| 8  | NEU-971  | JNJ-7706621  | 6.55      | <chem>NC1=NC(NC2=CC=C(C=C2)S(N)(=O)=O)=NN1C(=O)C1=C(F)C=CC=C1F</chem>                                                                 |
| 9  | NEU-973  | ON-01910     | <5.5      | <chem>COC1=CC(OC)=C(C=C\S(=O)(=O)CC2=CC=C(OC)C(NCC(=O)O[Na])=C2)C(OC)=C1</chem>                                                       |
| 10 | NEU-974  | CH5424802    | <5.5      | <chem>CCC1=CC2=C(C=C1N1CCC(CC1)N1CCOCC1)C(C)(C)C1=C(C3=CC=C(C=C3N1)C#N)C2=O</chem>                                                    |
| 11 | NEU-975  | Dinaciclib   | 7.41      | <chem>CCC1=C2N=C(C=C(NCC3=CC=C[N+](O-)=C3)N2N=C1)N1CCCC[C@H]1CCO</chem>                                                               |
| 12 | NEU-976  | Linsitinib   | <5.5      | <chem>C[C@@]1(O)C[C@@H](C1)C1=NC(=C2N1C=CN=C2N)C1=CC=C2C=CC(=NC2=C1)C1=CC=CC=C1</chem>                                                |
| 13 | NEU-977  | Roscovitine  | <5.5      | <chem>CC[C@H](CO)NC1=NC(NCC2=CC=CC=C2)=C2N=CN(C(C)C)C2=N1</chem>                                                                      |
| 14 | NEU-978  | CHIR-98014   | <5.5      | <chem>NC1=NC(NCCNC2=NC(=C(C=N2)N2C=CN=C2)C2=CC=C(Cl)C=C2Cl)=CC=C1N(=O)=O</chem>                                                       |
| 15 | NEU-979  | Volasertib   | <5.5      | <chem>CC[C@H]1N(C(C)C)C2=NC(NC3=CC=C(C=C3OC)C(=O)N[C@H]3CC[C@@H](CC3)N3CCN(CC4CC4)CC3)=NC=C2N(C)C1=O</chem>                           |
| 16 | NEU-980  | BI 2536      | 6.22      | <chem>CC[C@H]1N(C)C2=C(C=NC(NC3=CC=C(C=C3OC)C(=O)NC3CCN(C)CC3)=N2)N(C)C1=O</chem>                                                     |
| 17 | NEU-982  | AT7519       | 6.50      | <chem>C1C1=CC=CC(Cl)=C1C(=O)NC1=CN=C1C(=O)NC1CCNCC1</chem>                                                                            |
| 18 | NEU-984  | SNS-032      | 6.93      | <chem>CC(C)(C)C1=CN=C(CSC2=CN=C(NC(=O)C3CCNCC3)S2)O1</chem>                                                                           |
| 19 | NEU-985  | AZD5438      | 7.48      | <chem>CC(C)N1C(C)=NC=C1C1=CC=NC(NC2=CC=C(C=C2)S(C)(=O)=O)=N1</chem>                                                                   |
| 20 | NEU-986  | SB 415286    | 6.05      | <chem>OC1=C(Cl)C=C(CC2=C(C(=O)NC2=O)C2=C(C=CC=C2)N(=O)=O)C=C1</chem>                                                                  |
| 21 | NEU-987  | Flavopiridol | 6.75      | <chem>CN1CC[C@@H]([C@H](O)C1)C1=C(O)C=C(O)C2=C1OC(=CC2=O)C1=CC=CC=C1C</chem>                                                          |
| 22 | NEU-989  | TWS119       | 5.96      | <chem>NC1=CC=CC(=C1)C1=CC2=C(OC3=CC=CC(O)=C3)N=CN=C2N1</chem>                                                                         |
| 23 | NEU-990  | SB 216763    | <5.5      | <chem>CN1C=C(C2=CC=CC=C12)C1=C(C(=O)NC1=O)C1=C(Cl)C=C(Cl)C=C1</chem>                                                                  |
| 24 | NEU-991  | Tideglusib   | <5.5      | <chem>O=C1SN(C(=O)N1CC1=CC=CC=C1)C1=C2C=CC=CC2=CC=C1</chem>                                                                           |
| 25 | NEU-1007 | PHA-793887   | 5.73      | <chem>CC(C)CC(=O)NC1=NNC2=C1CN(C(=O)C1CCN(C)CC1)C2(C)C</chem>                                                                         |
| 26 | NEU-1049 | Harmine      | <5.5      | <chem>COC1=CC2=C(C=C1)C1=C(N2)C(C)=NC=C1</chem>                                                                                       |

**Table S3.** Human kinase potency data for the inhibitors of preferred human kinases and tested against protozoan pathogens and host cells.

| NEU number    | NEU-838                 | NEU-844             | NEU-893                  | NEU-967                 | NEU-968                 | NEU-969                 |
|---------------|-------------------------|---------------------|--------------------------|-------------------------|-------------------------|-------------------------|
| Name          | Crizotinib <sup>1</sup> | TAE684 <sup>2</sup> | GSK1838705A <sup>3</sup> | NVP-AEW541 <sup>4</sup> | BMS-265246 <sup>5</sup> | PHA-848125 <sup>6</sup> |
| T brucei EC50 | 0.432±0.075             | 0.1±0.046           | 1.98±0.083               | 1.82±0.348              | 0.457±0.163             | 0.027±0.0043            |
| PIK1          |                         |                     |                          |                         |                         |                         |
| IGF-1R        |                         |                     | 0.002                    | 0.15                    |                         |                         |
| ALK           | 0.024                   | 0.003               | 0.0005                   |                         |                         |                         |
| GSK-3α        |                         |                     |                          |                         |                         |                         |
| GSK-3β        |                         |                     |                          |                         |                         |                         |
| CDK1/cyc B    |                         |                     |                          |                         | 0.006                   |                         |
| CDK1          |                         |                     |                          |                         |                         |                         |
| CDK2          |                         |                     |                          |                         |                         |                         |
| CDK2/cyc E    |                         |                     |                          |                         | 0.009                   | 0.363                   |
| CDK2/cyc A    |                         |                     |                          |                         |                         | 0.045                   |
| CDK3/Cyc E    |                         |                     |                          |                         |                         |                         |
| CDK4          |                         |                     |                          |                         |                         |                         |
| CDK4/cyc D1   |                         |                     |                          |                         | 0.23                    | 0.16                    |
| CDK5          |                         |                     |                          |                         |                         |                         |
| p35/CDK5      |                         |                     |                          |                         |                         | 0.265                   |
| p25/CDK5      |                         |                     |                          |                         |                         |                         |
| CDK6          |                         |                     |                          |                         |                         |                         |
| CDK6/CycD3    |                         |                     |                          |                         |                         |                         |
| CDK7          |                         |                     |                          |                         |                         |                         |
| CDK7/cyc H    |                         |                     |                          |                         |                         | 0.15                    |
| CDK9          |                         |                     |                          |                         |                         |                         |
| CDK9/cyc T    |                         |                     |                          |                         |                         |                         |
| Aurora-A      |                         |                     |                          |                         |                         |                         |
| Aurora-B      |                         |                     |                          |                         |                         |                         |
| CLK1          |                         |                     |                          |                         |                         |                         |
| CLK2          |                         |                     |                          |                         |                         |                         |
| CLK3          |                         |                     |                          |                         |                         |                         |
| CLK4          |                         |                     |                          |                         |                         |                         |
| DYRK1A        |                         |                     |                          |                         |                         |                         |
| DYRK1B        |                         |                     |                          |                         |                         |                         |

| NEU number    | NEU-970                  | NEU-971                  | NEU-973               | NEU-974                 | NEU-975                  |
|---------------|--------------------------|--------------------------|-----------------------|-------------------------|--------------------------|
| Name          | GSK1904529A <sup>7</sup> | JNJ-7706621 <sup>8</sup> | ON-01910 <sup>9</sup> | CH5424802 <sup>10</sup> | Dinaciclib <sup>11</sup> |
| T brucei EC50 | 1.38±0.362               | 0.283±0.044              | >3                    | >3                      | 0.039±0.0056             |
| PIK1          |                          |                          | 0.009                 |                         |                          |
| IGF-1R        | 0.027                    |                          |                       |                         |                          |
| ALK           |                          |                          |                       | 0.0019                  |                          |
| GSK-3α        |                          |                          |                       |                         |                          |
| GSK-3β        |                          |                          |                       |                         |                          |
| CDK1/cyc B    |                          | 0.009                    |                       |                         |                          |
| CDK1          |                          |                          |                       |                         | 0.003                    |
| CDK2          |                          |                          |                       |                         | 0.001                    |
| CDK2/cyc E    |                          | 0.003                    |                       |                         |                          |
| CDK2/cyc A    |                          | 0.004                    |                       |                         |                          |
| CDK3/Cyc E    |                          |                          |                       |                         |                          |
| CDK4          |                          |                          |                       |                         |                          |
| CDK4/cyc D1   |                          |                          |                       |                         |                          |
| CDK5          |                          |                          |                       |                         |                          |
| p35/CDK5      |                          |                          |                       |                         | 0.001                    |
| p25/CDK5      |                          |                          |                       |                         |                          |
| CDK6          |                          |                          |                       |                         |                          |
| CDK6/CycD3    |                          |                          |                       |                         |                          |
| CDK7          |                          |                          |                       |                         |                          |
| CDK7/cyc H    |                          |                          |                       |                         |                          |
| CDK9          |                          |                          |                       |                         | 0.004                    |
| CDK9/cyc T    |                          |                          |                       |                         |                          |
| Aurora-A      |                          | 0.011                    |                       |                         |                          |
| Aurora-B      |                          | 0.015                    |                       |                         |                          |
| CLK1          |                          |                          |                       |                         |                          |
| CLK2          |                          |                          |                       |                         |                          |
| CLK3          |                          |                          |                       |                         |                          |
| CLK4          |                          |                          |                       |                         |                          |
| DYRK1A        |                          |                          |                       |                         |                          |
| DYRK1B        |                          |                          |                       |                         |                          |

| NEU number    | NEU-976                  | NEU-977                   | NEU-978                  | NEU-979                  | NEU-980               |
|---------------|--------------------------|---------------------------|--------------------------|--------------------------|-----------------------|
| Name          | Linsitinib <sup>12</sup> | Roscovitine <sup>13</sup> | CHIR-98014 <sup>14</sup> | Volasertib <sup>15</sup> | BI 2536 <sup>16</sup> |
| T brucei EC50 | >3                       | >3                        | >3                       | >3                       | 0.6±0.091             |
| PIK1          |                          |                           |                          | 0.00087                  | 0.00083               |
| IGF-1R        | 0.035                    |                           |                          |                          |                       |
| ALK           |                          |                           |                          |                          |                       |
| GSK-3α        |                          |                           | 0.00065                  |                          |                       |
| GSK-3β        |                          |                           | 0.00058                  |                          |                       |
| CDK1/cyc B    |                          |                           |                          |                          |                       |
| CDK1          |                          |                           |                          |                          |                       |
| CDC/cyc B     |                          | 0.65                      |                          |                          |                       |
| CDK2          |                          |                           |                          |                          |                       |
| CDK2/cyc E    |                          | 0.7                       |                          |                          |                       |
| CDK2/cyc A    |                          | 0.7                       |                          |                          |                       |
| CDK3/Cyc E    |                          |                           |                          |                          |                       |
| CDK4          |                          |                           |                          |                          |                       |
| CDK4/cyc D1   |                          |                           |                          |                          |                       |
| CDK5          |                          |                           |                          |                          |                       |
| p35/CDK5      |                          | 0.16                      |                          |                          |                       |
| p25/CDK5      |                          |                           |                          |                          |                       |
| CDK6          |                          |                           |                          |                          |                       |
| CDK6/CycD3    |                          |                           |                          |                          |                       |
| CDK7          |                          |                           |                          |                          |                       |
| CDK7/cyc H    |                          |                           |                          |                          |                       |
| CDK9          |                          |                           |                          |                          |                       |
| CDK9/cyc T    |                          |                           |                          |                          |                       |
| Aurora-A      |                          |                           |                          |                          |                       |
| Aurora-B      |                          |                           |                          |                          |                       |
| CLK1          |                          |                           |                          |                          |                       |
| CLK2          |                          |                           |                          |                          |                       |
| CLK3          |                          |                           |                          |                          |                       |
| CLK4          |                          |                           |                          |                          |                       |
| DYRK1A        |                          |                           |                          |                          |                       |
| DYRK1B        |                          |                           |                          |                          |                       |

| NEU number    | NEU-982              | NEU-984                   | NEU-985               | NEU-986                 | NEU-987                    |
|---------------|----------------------|---------------------------|-----------------------|-------------------------|----------------------------|
| Name          | AT7519 <sup>17</sup> | SNS-032 <sup>18, 19</sup> | AZD5438 <sup>20</sup> | SB 415286 <sup>21</sup> | Flavopiridol <sup>22</sup> |
| T brucei EC50 | 0.314±0.036          | 0.118±0.01                | 0.033±0.0027          | 0.89±0.684              | 0.177±0.072                |
| PIK1          |                      |                           |                       |                         |                            |
| IGF-1R        |                      |                           |                       |                         |                            |
| ALK           |                      |                           |                       |                         |                            |
| GSK-3α        |                      |                           |                       | 0.078                   |                            |
| GSK-3β        | 0.089                |                           |                       |                         |                            |
| CDK1/cyc B    | 0.21                 |                           | 0.016                 |                         |                            |
| CDK1          |                      | 0.48                      |                       |                         | 0.04                       |
| CDK2          |                      | 0.038                     |                       |                         | 0.04                       |
| CDK2/cyc E    |                      |                           | 0.006                 |                         |                            |
| CDK2/cyc A    | 0.047                | 0.038                     | 0.045                 |                         |                            |
| CDK3/Cyc E    | 0.36                 | 0.048                     |                       |                         |                            |
| CDK4          |                      | 0.925                     |                       |                         | 0.04                       |
| CDK4/cyc D1   | 0.1                  |                           |                       |                         |                            |
| CDK5          |                      |                           |                       |                         |                            |
| p35/CDK5      | 0.013                |                           |                       |                         |                            |
| p25/CDK5      |                      |                           | 0.014                 |                         |                            |
| CDK6          |                      |                           |                       |                         | 0.04                       |
| CDK6/CycD3    | 0.17                 |                           | 0.021                 |                         |                            |
| CDK7          |                      |                           |                       |                         |                            |
| CDK7/cyc H    |                      | 0.062                     | 0.821                 |                         | 0.3                        |
| CDK9          |                      |                           |                       |                         |                            |
| CDK9/cyc T    |                      | 0.004                     | 0.020                 |                         |                            |
| Aurora-A      |                      |                           |                       |                         |                            |
| Aurora-B      |                      |                           |                       |                         |                            |
| CLK1          |                      |                           |                       |                         |                            |
| CLK2          |                      |                           |                       |                         |                            |
| CLK3          |                      |                           |                       |                         |                            |
| CLK4          |                      |                           |                       |                         |                            |
| DYRK1A        |                      |                           |                       |                         |                            |
| DYRK1B        |                      |                           |                       |                         |                            |

| NEU number    | NEU-989              | NEU-990                 | NEU-991                  | NEU-1007                 | NEU-1049              |
|---------------|----------------------|-------------------------|--------------------------|--------------------------|-----------------------|
| Name          | TWS119 <sup>23</sup> | SB 216763 <sup>21</sup> | Tideglusib <sup>24</sup> | PHA-793887 <sup>25</sup> | Harmine <sup>26</sup> |
| T brucei EC50 | 1.102±0.134          | >3                      | >3                       | 1.88±0.332               | >3                    |
| PIK1          |                      |                         |                          |                          |                       |
| IGF-1R        |                      |                         |                          |                          |                       |
| ALK           |                      |                         |                          |                          |                       |
| GSK-3α        |                      | 0.0343                  |                          |                          | >10                   |
| GSK-3β        | 0.03                 |                         | 0.06                     | 0.079                    | >10                   |
| CDK1/cyc B    |                      |                         |                          | 0.06                     | 18                    |
| CDK1          |                      |                         |                          |                          |                       |
| CDK2          |                      |                         |                          |                          |                       |
| CDK2/cyc E    |                      |                         |                          | 0.008                    |                       |
| CDK2/cyc A    |                      |                         |                          | 0.008                    | >30                   |
| CDK3/Cyc E    |                      |                         |                          |                          |                       |
| CDK4          |                      |                         |                          |                          |                       |
| CDK4/cyc D1   |                      |                         |                          | 0.062                    |                       |
| CDK5          |                      |                         |                          |                          |                       |
| p35/CDK5      |                      |                         |                          |                          |                       |
| p25/CDK5      |                      |                         |                          | 0.005                    | 8                     |
| CDK6          |                      |                         |                          |                          |                       |
| CDK6/CycD3    |                      |                         |                          |                          |                       |
| CDK7          |                      |                         |                          |                          |                       |
| CDK7/cyc H    |                      |                         |                          | 0.01                     | >10                   |
| CDK9          |                      |                         |                          |                          |                       |
| CDK9/cyc T    |                      |                         |                          | 0.138                    | 0.72                  |
| Aurora-A      |                      |                         |                          |                          |                       |
| Aurora-B      |                      |                         |                          |                          |                       |
| CLK1          |                      |                         |                          |                          | 0.072                 |
| CLK2          |                      |                         |                          |                          | 0.28                  |
| CLK3          |                      |                         |                          |                          | >10                   |
| CLK4          |                      |                         |                          |                          | 0.05                  |
| DYRK1A        |                      |                         |                          |                          | 0.085                 |
| DYRK1B        |                      |                         |                          |                          | 0.028                 |



**Table S4.** Tanimoto analysis of purchased compounds versus PKIS inhibitors of the same primary human kinase.

| Cmpd    | Inhibitor_SMILES                                                                               | Primary Human Target | PKIS Compound >70% at 0.1 uM | PKIS_Parent_Smiles                                                                        | Tanimoto |
|---------|------------------------------------------------------------------------------------------------|----------------------|------------------------------|-------------------------------------------------------------------------------------------|----------|
| NEU-838 | <chem>C[C@@H](OC1=CC(=CN=C1N)C1=CN(N=C1)C1CCNCC1)C1=C(Cl)C=CC(F)=C1Cl</chem>                   | ALK                  | GSK1173862A                  | <chem>CCCN1CCCC(C1)c1ccc(Nc2nc(Nc3cc(F)ccc3C(N)=O)c3cc[nH]c3n2)c(OC)c1</chem>             | 0.444095 |
| NEU-838 | <chem>C[C@@H](OC1=CC(=CN=C1N)C1=CN(N=C1)C1CCNCC1)C1=C(Cl)C=CC(F)=C1Cl</chem>                   | ALK                  | GSK2213727A                  | <chem>COc1cc(C)c(NC(=O)CN(C)C)cc1Nc1nc(Nc2cccc(F)c2C(N)=O)c2cc[nH]c2n1</chem>             | 0.435692 |
| NEU-838 | <chem>C[C@@H](OC1=CC(=CN=C1N)C1=CN(N=C1)C1CCNCC1)C1=C(Cl)C=CC(F)=C1Cl</chem>                   | ALK                  | GSK1326255A                  | <chem>CCCN1CCC(CC1)c1ccc(Nc2nc(Nc3cc(F)ccc3C(N)=O)c3cc[nH]c3n2)c(OC)c1</chem>             | 0.427394 |
| NEU-838 | <chem>C[C@@H](OC1=CC(=CN=C1N)C1=CN(N=C1)C1CCNCC1)C1=C(Cl)C=CC(F)=C1Cl</chem>                   | ALK                  | GSK2163632A                  | <chem>COc1cc2c(cc1Nc1nc(Nc3ccsc3C(N)=O)c3cc[nH]c3n1)N(CCC2(C)C)C(=O)CN(C)C</chem>         | 0.476852 |
| NEU-838 | <chem>C[C@@H](OC1=CC(=CN=C1N)C1=CN(N=C1)C1CCNCC1)C1=C(Cl)C=CC(F)=C1Cl</chem>                   | ALK                  | GSK2220400A                  | <chem>CNC(=O)c1ncccc1Nc1nc(Nc2cc3N(CCCc3cc2OC)C(=O)CN(C)C)nc2[nH]ccc12</chem>             | 0.463869 |
| NEU-838 | <chem>C[C@@H](OC1=CC(=CN=C1N)C1=CN(N=C1)C1CCNCC1)C1=C(Cl)C=CC(F)=C1Cl</chem>                   | ALK                  | GSK2186269A                  | <chem>COc1cc2CCN(C(=O)CN(C)C)c2cc1Nc1nc(N2CCc3cccc23)c2cc[nH]c2n1</chem>                  | 0.458775 |
| NEU-838 | <chem>C[C@@H](OC1=CC(=CN=C1N)C1=CN(N=C1)C1CCNCC1)C1=C(Cl)C=CC(F)=C1Cl</chem>                   | ALK                  | GSK1220512A                  | <chem>COc1cc(ccc1Nc1nc(Nc2ccc(F)cc2C(N)=O)c2cc[nH]c2n1)N1CCN(CC1)C(C)C</chem>             | 0.427307 |
| NEU-838 | <chem>C[C@@H](OC1=CC(=CN=C1N)C1=CN(N=C1)C1CCNCC1)C1=C(Cl)C=CC(F)=C1Cl</chem>                   | ALK                  | GSK2110236A                  | <chem>COc1cc2CCCN(C(=O)CN(C)C)c2cc1Nc1nc(Nc2ccsc2C(N)=O)c2cc[nH]c2n1</chem>               | 0.461673 |
| NEU-838 | <chem>C[C@@H](OC1=CC(=CN=C1N)C1=CN(N=C1)C1CCNCC1)C1=C(Cl)C=CC(F)=C1Cl</chem>                   | ALK                  | GSK1392956A                  | <chem>COc1cc(ccc1Nc1nc(Nc2ccc(F)cc2C(=O)NC[C@@H](O)CO)c2cc[nH]c2n1)N1CCN(CC1)C(C)C</chem> | 0.445879 |
| NEU-838 | <chem>C[C@@H](OC1=CC(=CN=C1N)C1=CN(N=C1)C1CCNCC1)C1=C(Cl)C=CC(F)=C1Cl</chem>                   | ALK                  | GSK994854A                   | <chem>CCCN1CCC=C(C1)c1ccc(Nc2nc(Nc3cccc3C(N)=O)c3cc[nH]c3n2)c(C)c1</chem>                 | 0.398472 |
| NEU-844 | <chem>COC1=CC(=CC=C1NC1=NC=C(Cl)C(NC2=CC=CC=C2S(=O)(=O)C(C)C)=N1)N1CCC(CC1)N1C CN(C)CC1</chem> | ALK                  | GSK1173862A                  | <chem>CCCN1CCCC(C1)c1ccc(Nc2nc(Nc3cc(F)ccc3C(N)=O)c3cc[nH]c3n2)c(OC)c1</chem>             | 0.512115 |
| NEU-844 | <chem>COC1=CC(=CC=C1NC1=NC=C(Cl)C(NC2=CC=CC=C2S(=O)(=O)C(C)C)=N1)N1CCC(CC1)N1C CN(C)CC1</chem> | ALK                  | GSK2213727A                  | <chem>COc1cc(C)c(NC(=O)CN(C)C)cc1Nc1nc(Nc2cccc(F)c2C(N)=O)c2cc[nH]c2n1</chem>             | 0.530372 |
| NEU-844 | <chem>COC1=CC(=CC=C1NC1=NC=C(Cl)C(NC2=CC=CC=C2S(=O)(=O)C(C)C)=N1)N1CCC(CC1)N1C CN(C)CC1</chem> | ALK                  | GSK1326255A                  | <chem>CCCN1CCC(CC1)c1ccc(Nc2nc(Nc3cc(F)ccc3C(N)=O)c3cc[nH]c3n2)c(OC)c1</chem>             | 0.512375 |
| NEU-844 | <chem>COC1=CC(=CC=C1NC1=NC=C(Cl)C(NC2=CC=CC=C2S(=O)(=O)C(C)C)=N1)N1CCC(CC1)N1C CN(C)CC1</chem> | ALK                  | GSK2163632A                  | <chem>COc1cc2c(cc1Nc1nc(Nc3ccsc3C(N)=O)c3cc[nH]c3n1)N(CCC2(C)C)C(=O)CN(C)C</chem>         | 0.542444 |
| NEU-844 | <chem>COC1=CC(=CC=C1NC1=NC=C(Cl)C(NC2=CC=CC=C2S(=O)(=O)C(C)C)=N1)N1CCC(CC1)N1C CN(C)CC1</chem> | ALK                  | GSK2220400A                  | <chem>CNC(=O)c1ncccc1Nc1nc(Nc2cc3N(CCCc3cc2OC)C(=O)CN(C)C)nc2[nH]ccc12</chem>             | 0.524788 |
| NEU-844 | <chem>COC1=CC(=CC=C1NC1=NC=C(Cl)C(NC2=CC=CC=C2S(=O)(=O)C(C)C)=N1)N1CCC(CC1)N1C CN(C)CC1</chem> | ALK                  | GSK2186269A                  | <chem>COc1cc2CCN(C(=O)CN(C)C)c2cc1Nc1nc(N2CCc3cccc23)c2cc[nH]c2n1</chem>                  | 0.534238 |
| NEU-844 | <chem>COC1=CC(=CC=C1NC1=NC=C(Cl)C(NC2=CC=CC=C2S(=O)(=O)C(C)C)=N1)N1CCC(CC1)N1C CN(C)CC1</chem> | ALK                  | GSK1220512A                  | <chem>COc1cc(ccc1Nc1nc(Nc2ccc(F)cc2C(N)=O)c2cc[nH]c2n1)N1CCN(CC1)C(C)C</chem>             | 0.570637 |

|         |                                                                                      |        |             |                                                                                      |          |
|---------|--------------------------------------------------------------------------------------|--------|-------------|--------------------------------------------------------------------------------------|----------|
|         | CN(C)CC1                                                                             |        |             |                                                                                      |          |
| NEU-844 | COC1=CC(=CC=C1NC1=NC=C(Cl)C(NC2=CC=CC=C2S(=O)(=O)C(C)C)=N1)N1CCC(CC1)N1C<br>CN(C)CC1 | ALK    | GSK2110236A | COc1cc2CCCN(C(=O)CN(C)C)c2cc1Nc1<br>nc(Nc2ccsc2C(N)=O)c2cc[nH]c2n1                   | 0.53865  |
| NEU-844 | COC1=CC(=CC=C1NC1=NC=C(Cl)C(NC2=CC=CC=C2S(=O)(=O)C(C)C)=N1)N1CCC(CC1)N1C<br>CN(C)CC1 | ALK    | GSK1392956A | COc1cc(ccc1Nc1nc(Nc2ccc(F)cc2C(=O)N<br>C[C@@H](O)CO)c2cc[nH]c2n1)N1CCN(<br>CC1)C(C)C | 0.566689 |
| NEU-844 | COC1=CC(=CC=C1NC1=NC=C(Cl)C(NC2=CC=CC=C2S(=O)(=O)C(C)C)=N1)N1CCC(CC1)N1C<br>CN(C)CC1 | ALK    | GSK994854A  | CCCN1CCC=C(C1)c1ccc(Nc2nc(Nc3cccc<br>c3C(N)=O)c3cc[nH]c3n2)c(C)c1                    | 0.454845 |
| NEU-893 | CNC(=O)C1=C(NC2=C3C=CNC3=NC(NC3=CC4<br>=C(CCN4C(=O)CN(C)C)C=C3OC)=N2)C=CC=C<br>1F    | ALK    | GSK1173862A | CCCN1CCCC(C1)c1ccc(Nc2nc(Nc3cc(F)<br>ccc3C(N)=O)c3cc[nH]c3n2)c(OC)c1                 | 0.737441 |
| NEU-893 | CNC(=O)C1=C(NC2=C3C=CNC3=NC(NC3=CC4<br>=C(CCN4C(=O)CN(C)C)C=C3OC)=N2)C=CC=C<br>1F    | ALK    | GSK2213727A | COc1cc(C)c(NC(=O)CN(C)C)cc1Nc1nc(N<br>c2cccc(F)c2C(N)=O)c2cc[nH]c2n1                 | 0.875803 |
| NEU-893 | CNC(=O)C1=C(NC2=C3C=CNC3=NC(NC3=CC4<br>=C(CCN4C(=O)CN(C)C)C=C3OC)=N2)C=CC=C<br>1F    | ALK    | GSK1326255A | CCCN1CCC(CC1)c1ccc(Nc2nc(Nc3cc(F)<br>ccc3C(N)=O)c3cc[nH]c3n2)c(OC)c1                 | 0.72962  |
| NEU-893 | CNC(=O)C1=C(NC2=C3C=CNC3=NC(NC3=CC4<br>=C(CCN4C(=O)CN(C)C)C=C3OC)=N2)C=CC=C<br>1F    | ALK    | GSK2163632A | COc1cc2c(cc1Nc1nc(Nc3ccsc3C(N)=O)c<br>3cc[nH]c3n1)N(CCC2(C)C)C(=O)CN(C)C             | 0.798484 |
| NEU-893 | CNC(=O)C1=C(NC2=C3C=CNC3=NC(NC3=CC4<br>=C(CCN4C(=O)CN(C)C)C=C3OC)=N2)C=CC=C<br>1F    | ALK    | GSK2220400A | CNC(=O)c1ncccc1Nc1nc(Nc2cc3N(CCCc<br>3cc2OC)C(=O)CN(C)C)nc2[nH]ccc12                 | 0.829857 |
| NEU-893 | CNC(=O)C1=C(NC2=C3C=CNC3=NC(NC3=CC4<br>=C(CCN4C(=O)CN(C)C)C=C3OC)=N2)C=CC=C<br>1F    | ALK    | GSK2186269A | COc1cc2CCN(C(=O)CN(C)C)c2cc1Nc1nc<br>(N2CCc3ccccc23)c2cc[nH]c2n1                     | 0.832122 |
| NEU-893 | CNC(=O)C1=C(NC2=C3C=CNC3=NC(NC3=CC4<br>=C(CCN4C(=O)CN(C)C)C=C3OC)=N2)C=CC=C<br>1F    | ALK    | GSK1220512A | COc1cc(ccc1Nc1nc(Nc2ccc(F)cc2C(N)=O<br>)c2cc[nH]c2n1)N1CCN(CC1)C(C)C                 | 0.736735 |
| NEU-893 | CNC(=O)C1=C(NC2=C3C=CNC3=NC(NC3=CC4<br>=C(CCN4C(=O)CN(C)C)C=C3OC)=N2)C=CC=C<br>1F    | ALK    | GSK2110236A | COc1cc2CCCN(C(=O)CN(C)C)c2cc1Nc1<br>nc(Nc2ccsc2C(N)=O)c2cc[nH]c2n1                   | 0.815995 |
| NEU-893 | CNC(=O)C1=C(NC2=C3C=CNC3=NC(NC3=CC4<br>=C(CCN4C(=O)CN(C)C)C=C3OC)=N2)C=CC=C<br>1F    | ALK    | GSK1392956A | COc1cc(ccc1Nc1nc(Nc2ccc(F)cc2C(=O)N<br>C[C@@H](O)CO)c2cc[nH]c2n1)N1CCN(<br>CC1)C(C)C | 0.75814  |
| NEU-893 | CNC(=O)C1=C(NC2=C3C=CNC3=NC(NC3=CC4<br>=C(CCN4C(=O)CN(C)C)C=C3OC)=N2)C=CC=C<br>1F    | ALK    | GSK994854A  | CCCN1CCC=C(C1)c1ccc(Nc2nc(Nc3cccc<br>c3C(N)=O)c3cc[nH]c3n2)c(C)c1                    | 0.647059 |
| NEU-967 | NC1=C2C(=CN([C@@H]3C[C@H](CN4CCC4)C<br>3)C2=NC=N1)C1=CC(OCC2=CC=CC=C2)=CC=<br>C1     | IGF-1R | GSK1173862A | CCCN1CCCC(C1)c1ccc(Nc2nc(Nc3cc(F)<br>ccc3C(N)=O)c3cc[nH]c3n2)c(OC)c1                 | 0.474952 |
| NEU-967 | NC1=C2C(=CN([C@@H]3C[C@H](CN4CCC4)C                                                  | IGF-1R | GSK2213727A | COc1cc(C)c(NC(=O)CN(C)C)cc1Nc1nc(N                                                   | 0.465839 |

|         |                                                                          |            |                       |                                                                             |          |
|---------|--------------------------------------------------------------------------|------------|-----------------------|-----------------------------------------------------------------------------|----------|
|         | 3)C2=NC=N1)C1=CC(OCC2=CC=CC=C2)=CC=C1                                    |            |                       | c2cccc(F)c2C(N)=O)c2cc[nH]c2n1                                              |          |
| NEU-967 | NC1=C2C(=CN([C@@H]3C[C@H](CN4CCC4)C3)C2=NC=N1)C1=CC(OCC2=CC=CC=C2)=CC=C1 | IGF-1R     | GSK1326255A           | CCCN1CCC(CC1)c1ccc(Nc2nc(Nc3cc(F)ccc3C(N)=O)c3cc[nH]c3n2)c(OC)c1            | 0.46873  |
| NEU-967 | NC1=C2C(=CN([C@@H]3C[C@H](CN4CCC4)C3)C2=NC=N1)C1=CC(OCC2=CC=CC=C2)=CC=C1 | IGF-1R     | GSK2163632A           | COc1cc2c(cc1Nc1nc(Nc3ccsc3C(N)=O)c3cc[nH]c3n1)N(CCC2(C)C)C(=O)CN(C)C        | 0.502914 |
| NEU-967 | NC1=C2C(=CN([C@@H]3C[C@H](CN4CCC4)C3)C2=NC=N1)C1=CC(OCC2=CC=CC=C2)=CC=C1 | IGF-1R     | GSK2220400A           | CNC(=O)c1ncccc1Nc1nc(Nc2cc3N(CCCc3cc2OC)C(=O)CN(C)C)nc2[nH]ccc12            | 0.498819 |
| NEU-967 | NC1=C2C(=CN([C@@H]3C[C@H](CN4CCC4)C3)C2=NC=N1)C1=CC(OCC2=CC=CC=C2)=CC=C1 | IGF-1R     | GSK2186269A           | COc1cc2CCN(C(=O)CN(C)C)c2cc1Nc1nc(N2CCc3cccc23)c2cc[nH]c2n1                 | 0.482534 |
| NEU-967 | NC1=C2C(=CN([C@@H]3C[C@H](CN4CCC4)C3)C2=NC=N1)C1=CC(OCC2=CC=CC=C2)=CC=C1 | IGF-1R     | GSK1220512A           | COc1cc(ccc1Nc1nc(Nc2ccc(F)cc2C(N)=O)c2cc[nH]c2n1)N1CCN(CC1)C(C)C            | 0.45727  |
| NEU-967 | NC1=C2C(=CN([C@@H]3C[C@H](CN4CCC4)C3)C2=NC=N1)C1=CC(OCC2=CC=CC=C2)=CC=C1 | IGF-1R     | GSK2110236A           | COc1cc2CCCN(C(=O)CN(C)C)c2cc1Nc1nc(Nc2ccsc2C(N)=O)c2cc[nH]c2n1              | 0.49674  |
| NEU-967 | NC1=C2C(=CN([C@@H]3C[C@H](CN4CCC4)C3)C2=NC=N1)C1=CC(OCC2=CC=CC=C2)=CC=C1 | IGF-1R     | GSK1392956A           | COc1cc(ccc1Nc1nc(Nc2ccc(F)cc2C(=O)N[C@@H](O)CO)c2cc[nH]c2n1)N1CCN(CC1)C(C)C | 0.473358 |
| NEU-967 | NC1=C2C(=CN([C@@H]3C[C@H](CN4CCC4)C3)C2=NC=N1)C1=CC(OCC2=CC=CC=C2)=CC=C1 | IGF-1R     | GSK994854A            | CCCN1CCC=C(C1)c1ccc(Nc2nc(Nc3cccc3C(N)=O)c3cc[nH]c3n2)c(C)c1                | 0.461235 |
| NEU-968 | CCCCOC1=C2C=NNC2=NC=C1C(=O)C1=C(F)C=C(C)C=C1F                            | CDK1/cyc B | GW778894X             | N#Cc1cccc(Nc2nccc(n2)-c2cnn3ncccc23)c1                                      | 0.302113 |
| NEU-968 | CCCCOC1=C2C=NNC2=NC=C1C(=O)C1=C(F)C=C(C)C=C1F                            | CDK1/cyc B | PI_3-K_Inhibitor_VIII | O=S(N(C)/N=C/C1=CN=C2N1C=C(Br)C=C2)(C3=CC([N+](O-)=O)=CC=C3C)=O             | 0.377409 |
| NEU-968 | CCCCOC1=C2C=NNC2=NC=C1C(=O)C1=C(F)C=C(C)C=C1F                            | CDK1/cyc B | GW779439X             | CN1CCN(CC1)c1ccc(Nc2nccc(n2)-c2cnn3ncccc23)cc1C(F)(F)F                      | 0.352594 |
| NEU-968 | CCCCOC1=C2C=NNC2=NC=C1C(=O)C1=C(F)C=C(C)C=C1F                            | CDK1/cyc B | GW806290X             | C1COc2cc(Nc3nccc(n3)-c3cnn4ncccc34)ccc2O1                                   | 0.326923 |
| NEU-969 | CNC(=O)C1=NN(C)C2=C1C(C)(C)CC1=CN=C(NC3=CC=C(C=C3)N3CCN(C)CC3)N=C21      | CDK2/cyc A | GW778894X             | N#Cc1cccc(Nc2nccc(n2)-c2cnn3ncccc23)c1                                      | 0.404077 |
| NEU-969 | CNC(=O)C1=NN(C)C2=C1C(C)(C)CC1=CN=C(NC3=CC=C(C=C3)N3CCN(C)CC3)N=C21      | CDK2/cyc A | PI_3-K_Inhibitor_VIII | O=S(N(C)/N=C/C1=CN=C2N1C=C(Br)C=C2)(C3=CC([N+](O-)=O)=CC=C3C)=O             | 0.439955 |
| NEU-969 | CNC(=O)C1=NN(C)C2=C1C(C)(C)CC1=CN=C(NC3=CC=C(C=C3)N3CCN(C)CC3)N=C21      | CDK2/cyc A | GW779439X             | CN1CCN(CC1)c1ccc(Nc2nccc(n2)-c2cnn3ncccc23)cc1C(F)(F)F                      | 0.492982 |
| NEU-969 | CNC(=O)C1=NN(C)C2=C1C(C)(C)CC1=CN=C(NC3=CC=C(C=C3)N3CCN(C)CC3)N=C21      | CDK2/cyc A | GW396574X             | CC(C)=Cc1cccc2NC(=O)C(=N/Nc3ccc(cc3)S(N)(=O)=O)c12                          | 0.43714  |

|         |                                                                                                                         |            |             |                                                                      |          |
|---------|-------------------------------------------------------------------------------------------------------------------------|------------|-------------|----------------------------------------------------------------------|----------|
| NEU-969 | CNC(=O)C1=NN(C)C2=C1C(C)(C)CC1=CN=C(NC3=CC=C(C=C3)N3CCN(C)CC3)N=C21                                                     | CDK2/cyc A | GW290597X   | NS(=O)(=O)c1ccc(N\N=C2/C(=O)Nc3ccc(cc23)C(=O)NCCc2ccnc2)cc1          | 0.45711  |
| NEU-969 | CNC(=O)C1=NN(C)C2=C1C(C)(C)CC1=CN=C(NC3=CC=C(C=C3)N3CCN(C)CC3)N=C21                                                     | CDK2/cyc A | GW305178X   | NS(=O)(=O)c1ccc(N\N=C2/C(=O)Nc3ccc4ncccc4c23)cc1                     | 0.454702 |
| NEU-969 | CNC(=O)C1=NN(C)C2=C1C(C)(C)CC1=CN=C(NC3=CC=C(C=C3)N3CCN(C)CC3)N=C21                                                     | CDK2/cyc A | GW589933X   | NS(=O)(=O)c1ccc(NC=C2C(=O)Nc3ccc4ncsc4c23)cc1                        | 0.488474 |
| NEU-969 | CNC(=O)C1=NN(C)C2=C1C(C)(C)CC1=CN=C(NC3=CC=C(C=C3)N3CCN(C)CC3)N=C21                                                     | CDK2/cyc A | GW301784X   | CC(C)(CO)CNC(=O)c1ccc2NC(=O)C(=N/Nc3ccc(cc3)S(N)(=O)=O)c2c1          | 0.439861 |
| NEU-969 | CNC(=O)C1=NN(C)C2=C1C(C)(C)CC1=CN=C(NC3=CC=C(C=C3)N3CCN(C)CC3)N=C21                                                     | CDK2/cyc A | GW276655X   | NS(=O)(=O)c1ccc(N\N=C2/C(=O)Nc3ccc(cc23)-c2cnco2)cc1                 | 0.45879  |
| NEU-969 | CNC(=O)C1=NN(C)C2=C1C(C)(C)CC1=CN=C(NC3=CC=C(C=C3)N3CCN(C)CC3)N=C21                                                     | CDK2/cyc A | GW300657X   | NS(=O)(=O)c1ccc(N\N=C2/C(=O)Nc3ccc(cc23)C(=O)NCCc2ccncc2)cc1         | 0.440281 |
| NEU-969 | CNC(=O)C1=NN(C)C2=C1C(C)(C)CC1=CN=C(NC3=CC=C(C=C3)N3CCN(C)CC3)N=C21                                                     | CDK2/cyc A | GW297361X   | NS(=O)(=O)c1ccc(N\C=C2/C(=O)Nc3ccc4ncsc4c23)cc1                      | 0.488474 |
| NEU-969 | CNC(=O)C1=NN(C)C2=C1C(C)(C)CC1=CN=C(NC3=CC=C(C=C3)N3CCN(C)CC3)N=C21                                                     | CDK2/cyc A | GW416981X   | CC(C)COC(=O)c1ccc2NC(=O)C(=C/Nc3ccc(cc3)S(N)(=O)=O)c2c1              | 0.422093 |
| NEU-969 | CNC(=O)C1=NN(C)C2=C1C(C)(C)CC1=CN=C(NC3=CC=C(C=C3)N3CCN(C)CC3)N=C21                                                     | CDK2/cyc A | GW300660X   | NS(=O)(=O)c1ccc(N\N=C2/C(=O)Nc3ccc(cc23)C(=O)NCCc2c[nH]cn2)cc1       | 0.459178 |
| NEU-969 | CNC(=O)C1=NN(C)C2=C1C(C)(C)CC1=CN=C(NC3=CC=C(C=C3)N3CCN(C)CC3)N=C21                                                     | CDK2/cyc A | GW810576X   | COc1cccc(Nc2nccc(n2)-c2cnn3ncccc23)c1                                | 0.402278 |
| NEU-970 | CCC1=CC(NC2=NC=CC(=N2)C2=C(N=C3C=CC=CN23)C2=CC(C(=O)NC3=C(F)C=CC=C3F)=C(OC)C=C2)=C(OC)C=C1N1CCC(CC1)N1CCN(C1)S(C)(=O)=O | IGF-1R     | GSK1173862A | CCCN1CCCC(C1)c1ccc(Nc2nc(Nc3cc(F)ccc3C(N)=O)c3cc[nH]c3n2)c(OC)c1     | 0.555866 |
| NEU-970 | CCC1=CC(NC2=NC=CC(=N2)C2=C(N=C3C=CC=CN23)C2=CC(C(=O)NC3=C(F)C=CC=C3F)=C(OC)C=C2)=C(OC)C=C1N1CCC(CC1)N1CCN(C1)S(C)(=O)=O | IGF-1R     | GSK2213727A | COc1cc(C)c(NC(=O)CN(C)C)cc1Nc1nc(Nc2cccc(F)c2C(N)=O)c2cc[nH]c2n1     | 0.572225 |
| NEU-970 | CCC1=CC(NC2=NC=CC(=N2)C2=C(N=C3C=CC=CN23)C2=CC(C(=O)NC3=C(F)C=CC=C3F)=C(OC)C=C2)=C(OC)C=C1N1CCC(CC1)N1CCN(C1)S(C)(=O)=O | IGF-1R     | GSK1326255A | CCCN1CCC(CC1)c1ccc(Nc2nc(Nc3cc(F)ccc3C(N)=O)c3cc[nH]c3n2)c(OC)c1     | 0.541104 |
| NEU-970 | CCC1=CC(NC2=NC=CC(=N2)C2=C(N=C3C=CC=CN23)C2=CC(C(=O)NC3=C(F)C=CC=C3F)=C(OC)C=C2)=C(OC)C=C1N1CCC(CC1)N1CCN(C1)S(C)(=O)=O | IGF-1R     | GSK2163632A | COc1cc2c(cc1Nc1nc(Nc3ccsc3C(N)=O)c3cc[nH]c3n1)N(CCC2(C)C)C(=O)CN(C)C | 0.640389 |
| NEU-970 | CCC1=CC(NC2=NC=CC(=N2)C2=C(N=C3C=CC=CN23)C2=CC(C(=O)NC3=C(F)C=CC=C3F)=C(OC)C=C2)=C(OC)C=C1N1CCC(CC1)N1CCN(C1)S(C)(=O)=O | IGF-1R     | GSK2220400A | CNC(=O)c1ncccc1Nc1nc(Nc2cc3N(CCCc3cc2OC)C(=O)CN(C)C)nc2[nH]ccc12     | 0.625813 |
| NEU-970 | CCC1=CC(NC2=NC=CC(=N2)C2=C(N=C3C=CC=CN23)C2=CC(C(=O)NC3=C(F)C=CC=C3F)=C(OC)C=C2)=C(OC)C=C1N1CCC(CC1)N1CCN(C1)S(C)(=O)=O | IGF-1R     | GSK2186269A | COc1cc2CCN(C(=O)CN(C)C)c2cc1Nc1nc(N2CCc3cccc23)c2cc[nH]c2n1          | 0.620011 |

|         |                                                                                                                         |            |                       |                                                                              |          |
|---------|-------------------------------------------------------------------------------------------------------------------------|------------|-----------------------|------------------------------------------------------------------------------|----------|
| NEU-970 | CCC1=CC(NC2=NC=CC(=N2)C2=C(N=C3C=CC=CN23)C2=CC(C(=O)NC3=C(F)C=CC=C3F)=C(OC)C=C2)=C(OC)C=C1N1CCC(CC1)N1CCN(C1)S(C)(=O)=O | IGF-1R     | GSK1220512A           | COc1cc(ccc1Nc1nc(Nc2ccc(F)cc2C(N)=O)c2cc[nH]c2n1)N1CCN(CC1)C(C)C             | 0.561753 |
| NEU-970 | CCC1=CC(NC2=NC=CC(=N2)C2=C(N=C3C=CC=CN23)C2=CC(C(=O)NC3=C(F)C=CC=C3F)=C(OC)C=C2)=C(OC)C=C1N1CCC(CC1)N1CCN(C1)S(C)(=O)=O | IGF-1R     | GSK2110236A           | COc1cc2CCCN(C(=O)CN(C)C)c2cc1Nc1nc(Nc2ccsc2C(N)=O)c2cc[nH]c2n1               | 0.626158 |
| NEU-970 | CCC1=CC(NC2=NC=CC(=N2)C2=C(N=C3C=CC=CN23)C2=CC(C(=O)NC3=C(F)C=CC=C3F)=C(OC)C=C2)=C(OC)C=C1N1CCC(CC1)N1CCN(C1)S(C)(=O)=O | IGF-1R     | GSK1392956A           | COc1cc(ccc1Nc1nc(Nc2ccc(F)cc2C(=O)NC[C@@H](O)CO)c2cc[nH]c2n1)N1CCN(CC1)C(C)C | 0.586689 |
| NEU-970 | CCC1=CC(NC2=NC=CC(=N2)C2=C(N=C3C=CC=CN23)C2=CC(C(=O)NC3=C(F)C=CC=C3F)=C(OC)C=C2)=C(OC)C=C1N1CCC(CC1)N1CCN(C1)S(C)(=O)=O | IGF-1R     | GSK994854A            | CCCN1CCC=C(C1)c1ccc(Nc2nc(Nc3cccc3C(N)=O)c3cc[nH]c3n2)c(C)c1                 | 0.49721  |
| NEU-971 | NC1=NC(NC2=CC=C(C=C2)S(N)(=O)=O)=NN1C(=O)C1=C(F)C=CC=C1F                                                                | CDK2/cyc E | GW778894X             | N#Cc1cccc(Nc2nccc(n2)-c2cnn3ncccc23)c1                                       | 0.327977 |
| NEU-971 | NC1=NC(NC2=CC=C(C=C2)S(N)(=O)=O)=NN1C(=O)C1=C(F)C=CC=C1F                                                                | CDK2/cyc E | PI_3-K_Inhibitor_VIII | O=S(N(C)/N=C/C1=CN=C2N1C=C(Br)C=C2)(C3=CC([N+])([O-])=O)=CC=C3C)=O           | 0.386286 |
| NEU-971 | NC1=NC(NC2=CC=C(C=C2)S(N)(=O)=O)=NN1C(=O)C1=C(F)C=CC=C1F                                                                | CDK2/cyc E | GW779439X             | CN1CCN(CC1)c1ccc(Nc2nccc(n2)-c2cnn3ncccc23)cc1C(F)(F)F                       | 0.358099 |
| NEU-971 | NC1=NC(NC2=CC=C(C=C2)S(N)(=O)=O)=NN1C(=O)C1=C(F)C=CC=C1F                                                                | CDK2/cyc E | GW806290X             | C1COc2cc(Nc3nccc(n3)-c3cnn4ncccc34)ccc2O1                                    | 0.331232 |
| NEU-971 | NC1=NC(NC2=CC=C(C=C2)S(N)(=O)=O)=NN1C(=O)C1=C(F)C=CC=C1F                                                                | CDK2/cyc E | GW396574X             | CC(C)=Cc1cccc2NC(=O)C(=N/Nc3ccc(cc3)S(N)(=O)=O)c12                           | 0.378151 |
| NEU-971 | NC1=NC(NC2=CC=C(C=C2)S(N)(=O)=O)=NN1C(=O)C1=C(F)C=CC=C1F                                                                | CDK2/cyc E | GW305178X             | NS(=O)(=O)c1ccc(N/N=C2/C(=O)Nc3ccc4ncccc4c23)cc1                             | 0.386364 |
| NEU-971 | NC1=NC(NC2=CC=C(C=C2)S(N)(=O)=O)=NN1C(=O)C1=C(F)C=CC=C1F                                                                | CDK2/cyc E | GW589933X             | NS(=O)(=O)c1ccc(NC=C2C(=O)Nc3ccc4ncsc4c23)cc1                                | 0.40617  |
| NEU-971 | NC1=NC(NC2=CC=C(C=C2)S(N)(=O)=O)=NN1C(=O)C1=C(F)C=CC=C1F                                                                | CDK2/cyc E | GW300657X             | NS(=O)(=O)c1ccc(N/N=C2/C(=O)Nc3ccc(cc23)C(=O)NCc2ccncc2)cc1                  | 0.380884 |
| NEU-971 | NC1=NC(NC2=CC=C(C=C2)S(N)(=O)=O)=NN1C(=O)C1=C(F)C=CC=C1F                                                                | CDK2/cyc E | GW297361X             | NS(=O)(=O)c1ccc(N/C=C2/C(=O)Nc3ccc4ncsc4c23)cc1                              | 0.40617  |
| NEU-971 | NC1=NC(NC2=CC=C(C=C2)S(N)(=O)=O)=NN1C(=O)C1=C(F)C=CC=C1F                                                                | CDK2/cyc E | GW300660X             | NS(=O)(=O)c1ccc(N/N=C2/C(=O)Nc3ccc(cc23)C(=O)NCc2c[nH]cn2)cc1                | 0.385149 |
| NEU-972 | COC1=CC=C(C=C1)S(=O)(=O)N(C(C)=O)C1=C(\C=C\C2=CC=[N+])([O-])C=C2)C=CC=C1                                                | PLK1       | GSK2213727A           | COc1cc(C)c(NC(=O)CN(C)C)cc1Nc1nc(Nc2ccc(F)c2C(N)=O)c2cc[nH]c2n1              | 0.430979 |
| NEU-972 | COC1=CC=C(C=C1)S(=O)(=O)N(C(C)=O)C1=C(\C=C\C2=CC=[N+])([O-])C=C2)C=CC=C1                                                | PLK1       | GSK2220400A           | CNC(=O)c1ncccc1Nc1nc(Nc2cc3N(CCCc3cc2OC)C(=O)CN(C)C)nc2[nH]ccc12             | 0.440555 |
| NEU-972 | COC1=CC=C(C=C1)S(=O)(=O)N(C(C)=O)C1=C(\C=C\C2=CC=[N+])([O-])C=C2)C=CC=C1                                                | PLK1       | GSK2110236A           | COc1cc2CCCN(C(=O)CN(C)C)c2cc1Nc1nc(Nc2ccsc2C(N)=O)c2cc[nH]c2n1               | 0.436441 |
| NEU-972 | COC1=CC=C(C=C1)S(=O)(=O)N(C(C)=O)C1=C(\C=C\C2=CC=[N+])([O-])C=C2)C=CC=C1                                                | PLK1       | GSK571989A            | C[C@@H](OC1cc(sc1C(N)=O)-                                                    | 0.401979 |

|         |                                                                                       |      |             |                                                                                               |          |
|---------|---------------------------------------------------------------------------------------|------|-------------|-----------------------------------------------------------------------------------------------|----------|
|         | <chem>\C=C\C2=CC=[N+][([O-])C=C2]C=CC=C1</chem>                                       |      |             | <chem>n1cnc2ccc(OCC3CCN(C)CC3)cc12)c1ccc<br/>cc1Cl</chem>                                     |          |
| NEU-972 | <chem>COC1=CC=C(C=C1)S(=O)(=O)N(C(C)=O)C1=C(\C=C\C2=CC=[N+][([O-])C=C2]C=CC=C1</chem> | PLK1 | GSK317315A  | <chem>COc1ccc2ncn(-<br/>c3cc(O[C@H](C)c4ccccc4C(F)(F)F)c(s3)<br/>C(N)=O)c2c1</chem>           | 0.394393 |
| NEU-972 | <chem>COC1=CC=C(C=C1)S(=O)(=O)N(C(C)=O)C1=C(\C=C\C2=CC=[N+][([O-])C=C2]C=CC=C1</chem> | PLK1 | GSK237701A  | <chem>COc1cc2ncn(-<br/>c3cc(O[C@H](C)c4ccccc4Cl)c(s3)C(N)=O<br/>c2cc1OC</chem>                | 0.397252 |
| NEU-972 | <chem>COC1=CC=C(C=C1)S(=O)(=O)N(C(C)=O)C1=C(\C=C\C2=CC=[N+][([O-])C=C2]C=CC=C1</chem> | PLK1 | GSK579289A  | <chem>C[C@@H](Oc1cc(sc1C(N)=O)-<br/>n1cnc2ccc(OC3CCN(C)CC3)cc12)c1cccc<br/>c1Cl</chem>        | 0.395923 |
| NEU-972 | <chem>COC1=CC=C(C=C1)S(=O)(=O)N(C(C)=O)C1=C(\C=C\C2=CC=[N+][([O-])C=C2]C=CC=C1</chem> | PLK1 | GSK317314A  | <chem>COc1ccc2ncn(-<br/>c3cc(O[C@H](C)c4ccccc4Cl)c(s3)C(N)=O<br/>c2c1</chem>                  | 0.39103  |
| NEU-972 | <chem>COC1=CC=C(C=C1)S(=O)(=O)N(C(C)=O)C1=C(\C=C\C2=CC=[N+][([O-])C=C2]C=CC=C1</chem> | PLK1 | GW852849X   | <chem>COc1cc2ncn(-<br/>c3cc(OCc4ccccc4Cl)c(s3)C(N)=O)c2cc1O<br/>C</chem>                      | 0.38648  |
| NEU-972 | <chem>COC1=CC=C(C=C1)S(=O)(=O)N(C(C)=O)C1=C(\C=C\C2=CC=[N+][([O-])C=C2]C=CC=C1</chem> | PLK1 | GW843682X   | <chem>COc1cc2ncn(-<br/>c3cc(OCc4ccccc4C(F)(F)F)c(s3)C(N)=O)c<br/>2cc1OC</chem>                | 0.386751 |
| NEU-972 | <chem>COC1=CC=C(C=C1)S(=O)(=O)N(C(C)=O)C1=C(\C=C\C2=CC=[N+][([O-])C=C2]C=CC=C1</chem> | PLK1 | GSK978744A  | <chem>C[C@@H](Oc1cc(sc1C(N)=O)-<br/>n1cnc2ccc(OC[C@H](O)CO)cc12)c1cc<br/>ccc1Cl</chem>        | 0.395392 |
| NEU-972 | <chem>COC1=CC=C(C=C1)S(=O)(=O)N(C(C)=O)C1=C(\C=C\C2=CC=[N+][([O-])C=C2]C=CC=C1</chem> | PLK1 | GSK326090A  | <chem>C[C@@H](Oc1cc(sc1C(N)=O)-<br/>n1cnc2ccc(OCC3CCN(C)CC3)cc12)c1ccc<br/>cc1C(F)(F)F</chem> | 0.405257 |
| NEU-972 | <chem>COC1=CC=C(C=C1)S(=O)(=O)N(C(C)=O)C1=C(\C=C\C2=CC=[N+][([O-])C=C2]C=CC=C1</chem> | PLK1 | GSK237700A  | <chem>COc1cc2ncn(-<br/>c3cc(O[C@@H](C)c4ccccc4Cl)c(s3)C(N)<br/>=O)c2cc1OC</chem>              | 0.397252 |
| NEU-972 | <chem>COC1=CC=C(C=C1)S(=O)(=O)N(C(C)=O)C1=C(\C=C\C2=CC=[N+][([O-])C=C2]C=CC=C1</chem> | PLK1 | GSK312948A  | <chem>COc1cc2ncn(-<br/>c3cc(OCc4cccs4)c(s3)C(N)=O)c2cc1OC</chem>                              | 0.379576 |
| NEU-972 | <chem>COC1=CC=C(C=C1)S(=O)(=O)N(C(C)=O)C1=C(\C=C\C2=CC=[N+][([O-])C=C2]C=CC=C1</chem> | PLK1 | GW853606X   | <chem>NC(=O)c1sc(cc1OCc1ccccc1Br)-<br/>n1cnc2ccc(cc12)C(F)(F)F</chem>                         | 0.387716 |
| NEU-972 | <chem>COC1=CC=C(C=C1)S(=O)(=O)N(C(C)=O)C1=C(\C=C\C2=CC=[N+][([O-])C=C2]C=CC=C1</chem> | PLK1 | GSK1023156A | <chem>NC(=O)c1sc(cc1OCc1ccccc1Br)-<br/>n1cnc2ccccc12</chem>                                   | 0.362376 |
| NEU-973 | <chem>COC1=CC(OC)=C(\C=C\S(=O)(=O)CC2=CC=C(\OC)C(NCC(=O)O[Na])=C2)C(OC)=C1</chem>     | PLK1 | GSK2213727A | <chem>COc1cc(C)c(NC(=O)CN(C)C)cc1Nc1nc(N<br/>c2cccc(F)c2C(N)=O)c2cc[nH]c2n1</chem>            | 0.338076 |
| NEU-973 | <chem>COC1=CC(OC)=C(\C=C\S(=O)(=O)CC2=CC=C(\OC)C(NCC(=O)O[Na])=C2)C(OC)=C1</chem>     | PLK1 | GSK2220400A | <chem>CNC(=O)c1cccc1Nc1nc(Nc2cc3N(CCCc<br/>3cc2OC)C(=O)CN(C)C)nc2[nH]ccc12</chem>             | 0.351317 |
| NEU-973 | <chem>COC1=CC(OC)=C(\C=C\S(=O)(=O)CC2=CC=C(\OC)C(NCC(=O)O[Na])=C2)C(OC)=C1</chem>     | PLK1 | GSK2110236A | <chem>COc1cc2CCCN(C(=O)CN(C)C)c2cc1Nc1<br/>nc(Nc2ccsc2C(N)=O)c2cc[nH]c2n1</chem>              | 0.341693 |
| NEU-973 | <chem>COC1=CC(OC)=C(\C=C\S(=O)(=O)CC2=CC=C(\OC)C(NCC(=O)O[Na])=C2)C(OC)=C1</chem>     | PLK1 | GSK571989A  | <chem>C[C@@H](Oc1cc(sc1C(N)=O)-<br/>n1cnc2ccc(OCC3CCN(C)CC3)cc12)c1ccc<br/>cc1Cl</chem>       | 0.309723 |

|         |                                                                       |      |             |                                                                      |          |
|---------|-----------------------------------------------------------------------|------|-------------|----------------------------------------------------------------------|----------|
| NEU-973 | COC1=CC(OC)=C(\C=C\S(=O)(=O)CC2=CC=C(OC)C(NCC(=O)O[Na])=C2)C(OC)=C1   | PLK1 | GSK317315A  | COc1ccc2ncn(-c3cc(O[C@H](C)c4ccccc4C(F)(F)F)c(s3)C(N)=O)c2c1         | 0.309602 |
| NEU-973 | COC1=CC(OC)=C(\C=C\S(=O)(=O)CC2=CC=C(OC)C(NCC(=O)O[Na])=C2)C(OC)=C1   | PLK1 | GSK237701A  | COc1cc2ncn(-c3cc(O[C@H](C)c4ccccc4Cl)c(s3)C(N)=O)c2cc1OC             | 0.315824 |
| NEU-973 | COC1=CC(OC)=C(\C=C\S(=O)(=O)CC2=CC=C(OC)C(NCC(=O)O[Na])=C2)C(OC)=C1   | PLK1 | GSK579289A  | C[C@@H](Oc1cc(sc1C(N)=O)-n1cnc2ccc(OC3CCN(C)CC3)cc12)c1cccc1Cl       | 0.314527 |
| NEU-973 | COC1=CC(OC)=C(\C=C\S(=O)(=O)CC2=CC=C(OC)C(NCC(=O)O[Na])=C2)C(OC)=C1   | PLK1 | GSK317314A  | COc1ccc2ncn(-c3cc(O[C@H](C)c4ccccc4Cl)c(s3)C(N)=O)c2c1               | 0.309176 |
| NEU-973 | COC1=CC(OC)=C(\C=C\S(=O)(=O)CC2=CC=C(OC)C(NCC(=O)O[Na])=C2)C(OC)=C1   | PLK1 | GW852849X   | COc1cc2ncn(-c3cc(OCc4ccccc4Cl)c(s3)C(N)=O)c2cc1OC                    | 0.311486 |
| NEU-973 | COC1=CC(OC)=C(\C=C\S(=O)(=O)CC2=CC=C(OC)C(NCC(=O)O[Na])=C2)C(OC)=C1   | PLK1 | GW843682X   | COc1cc2ncn(-c3cc(OCc4ccccc4C(F)(F)F)c(s3)C(N)=O)c2cc1OC              | 0.309127 |
| NEU-973 | COC1=CC(OC)=C(\C=C\S(=O)(=O)CC2=CC=C(OC)C(NCC(=O)O[Na])=C2)C(OC)=C1   | PLK1 | GSK978744A  | C[C@@H](Oc1cc(sc1C(N)=O)-n1cnc2ccc(OC[C@@H](O)CO)cc12)c1ccc1Cl       | 0.312418 |
| NEU-973 | COC1=CC(OC)=C(\C=C\S(=O)(=O)CC2=CC=C(OC)C(NCC(=O)O[Na])=C2)C(OC)=C1   | PLK1 | GSK326090A  | C[C@@H](Oc1cc(sc1C(N)=O)-n1cnc2ccc(OC3CCN(C)CC3)cc12)c1ccc1C(F)(F)F  | 0.312579 |
| NEU-973 | COC1=CC(OC)=C(\C=C\S(=O)(=O)CC2=CC=C(OC)C(NCC(=O)O[Na])=C2)C(OC)=C1   | PLK1 | GSK237700A  | COc1cc2ncn(-c3cc(O[C@@H](C)c4ccccc4Cl)c(s3)C(N)=O)c2cc1OC            | 0.315824 |
| NEU-973 | COC1=CC(OC)=C(\C=C\S(=O)(=O)CC2=CC=C(OC)C(NCC(=O)O[Na])=C2)C(OC)=C1   | PLK1 | GSK312948A  | COc1cc2ncn(-c3cc(OCc4cccs4)c(s3)C(N)=O)c2cc1OC                       | 0.305385 |
| NEU-973 | COC1=CC(OC)=C(\C=C\S(=O)(=O)CC2=CC=C(OC)C(NCC(=O)O[Na])=C2)C(OC)=C1   | PLK1 | GW853606X   | NC(=O)c1sc(cc1OCc1ccccc1Br)-n1cnc2ccc(cc12)C(F)(F)F                  | 0.297587 |
| NEU-973 | COC1=CC(OC)=C(\C=C\S(=O)(=O)CC2=CC=C(OC)C(NCC(=O)O[Na])=C2)C(OC)=C1   | PLK1 | GSK1023156A | NC(=O)c1sc(cc1OCc1ccccc1Br)-n1cnc2ccccc12                            | 0.28042  |
| NEU-974 | CCC1=CC2=C(C=C1N1CCC(CC1)N1CCOCC1)C(C)(C)C1=C(C3=CC=C(C=C3N1)C#N)C2=O | ALK  | GSK1173862A | CCCN1CCCC(C1)c1ccc(Nc2nc(Nc3cc(F)ccc3C(N)=O)c3cc[nH]c3n2)c(OC)c1     | 0.5      |
| NEU-974 | CCC1=CC2=C(C=C1N1CCC(CC1)N1CCOCC1)C(C)(C)C1=C(C3=CC=C(C=C3N1)C#N)C2=O | ALK  | GSK2213727A | COc1cc(C)c(NC(=O)CN(C)C)cc1Nc1nc(Nc2cccc(F)c2C(N)=O)c2cc[nH]c2n1     | 0.502278 |
| NEU-974 | CCC1=CC2=C(C=C1N1CCC(CC1)N1CCOCC1)C(C)(C)C1=C(C3=CC=C(C=C3N1)C#N)C2=O | ALK  | GSK1326255A | CCCN1CCC(CC1)c1ccc(Nc2nc(Nc3cc(F)ccc3C(N)=O)c3cc[nH]c3n2)c(OC)c1     | 0.486911 |
| NEU-974 | CCC1=CC2=C(C=C1N1CCC(CC1)N1CCOCC1)C(C)(C)C1=C(C3=CC=C(C=C3N1)C#N)C2=O | ALK  | GSK2163632A | COc1cc2c(cc1Nc1nc(Nc3ccsc3C(N)=O)c3cc[nH]c3n1)N(CCC2(C)C)C(=O)CN(C)C | 0.581949 |
| NEU-974 | CCC1=CC2=C(C=C1N1CCC(CC1)N1CCOCC1)C(C)(C)C1=C(C3=CC=C(C=C3N1)C#N)C2=O | ALK  | GSK2220400A | CNC(=O)c1ncccc1Nc1nc(Nc2cc3N(CCCc3cc2OC)C(=O)CN(C)C)nc2[nH]ccc12     | 0.573743 |
| NEU-974 | CCC1=CC2=C(C=C1N1CCC(CC1)N1CCOCC1)C(C)(C)C1=C(C3=CC=C(C=C3N1)C#N)C2=O | ALK  | GSK2186269A | COc1cc2CCN(C(=O)CN(C)C)c2cc1Nc1nc                                    | 0.555928 |

|         |                                                                            |            |                       |                                                                               |          |
|---------|----------------------------------------------------------------------------|------------|-----------------------|-------------------------------------------------------------------------------|----------|
|         | C(C)(C)C1=C(C3=CC=C(C=C3N1)C#N)C2=O                                        |            |                       | (N2CCc3ccccc23)c2cc[nH]c2n1                                                   |          |
| NEU-974 | CCC1=CC2=C(C=C1N1CCC(CC1)N1CCOCC1)C(C)(C)C1=C(C3=CC=C(C=C3N1)C#N)C2=O      | ALK        | GSK1220512A           | COc1cc(ccc1Nc1nc(Nc2ccc(F)cc2C(N)=O)c2cc[nH]c2n1)N1CCN(CC1)C(C)C              | 0.488386 |
| NEU-974 | CCC1=CC2=C(C=C1N1CCC(CC1)N1CCOCC1)C(C)(C)C1=C(C3=CC=C(C=C3N1)C#N)C2=O      | ALK        | GSK2110236A           | COc1cc2CCCN(C(=O)CN(C)C)c2cc1Nc1nc(Nc2ccsc2C(N)=O)c2cc[nH]c2n1                | 0.563302 |
| NEU-974 | CCC1=CC2=C(C=C1N1CCC(CC1)N1CCOCC1)C(C)(C)C1=C(C3=CC=C(C=C3N1)C#N)C2=O      | ALK        | GSK1392956A           | COc1cc(ccc1Nc1nc(Nc2ccc(F)cc2C(=O)N C[C@@H](O)CO)c2cc[nH]c2n1)N1CCN(CC1)C(C)C | 0.520321 |
| NEU-974 | CCC1=CC2=C(C=C1N1CCC(CC1)N1CCOCC1)C(C)(C)C1=C(C3=CC=C(C=C3N1)C#N)C2=O      | ALK        | GSK994854A            | CCCN1CCC=C(C1)c1ccc(Nc2nc(Nc3ccccc3C(N)=O)c3cc[nH]c3n2)c(C)c1                 | 0.471765 |
| NEU-976 | C[C@@]1(O)C[C@@H](C1)C1=NC(=C2N1C=C N=C2N)C1=CC=C2C=CC(=NC2=C1)C1=CC=CC=C1 | IGF-1R     | GSK1173862A           | CCCN1CCCC(C1)c1ccc(Nc2nc(Nc3cc(F)ccc3C(N)=O)c3cc[nH]c3n2)c(OC)c1              | 0.421308 |
| NEU-976 | C[C@@]1(O)C[C@@H](C1)C1=NC(=C2N1C=C N=C2N)C1=CC=C2C=CC(=NC2=C1)C1=CC=CC=C1 | IGF-1R     | GSK2213727A           | COc1cc(C)c(NC(=O)CN(C)C)cc1Nc1nc(Nc2ccc(F)c2C(N)=O)c2cc[nH]c2n1               | 0.418702 |
| NEU-976 | C[C@@]1(O)C[C@@H](C1)C1=NC(=C2N1C=C N=C2N)C1=CC=C2C=CC(=NC2=C1)C1=CC=CC=C1 | IGF-1R     | GSK1326255A           | CCCN1CCC(CC1)c1ccc(Nc2nc(Nc3cc(F)ccc3C(N)=O)c3cc[nH]c3n2)c(OC)c1              | 0.405009 |
| NEU-976 | C[C@@]1(O)C[C@@H](C1)C1=NC(=C2N1C=C N=C2N)C1=CC=C2C=CC(=NC2=C1)C1=CC=CC=C1 | IGF-1R     | GSK2163632A           | COc1cc2c(cc1Nc1nc(Nc3ccsc3C(N)=O)c3cc[nH]c3n1)N(CCC2(C)C)C(=O)CN(C)C          | 0.471986 |
| NEU-976 | C[C@@]1(O)C[C@@H](C1)C1=NC(=C2N1C=C N=C2N)C1=CC=C2C=CC(=NC2=C1)C1=CC=CC=C1 | IGF-1R     | GSK2220400A           | CNC(=O)c1ncccc1Nc1nc(Nc2cc3N(CCCc3cc2OC)C(=O)CN(C)C)nc2[nH]ccc12              | 0.460091 |
| NEU-976 | C[C@@]1(O)C[C@@H](C1)C1=NC(=C2N1C=C N=C2N)C1=CC=C2C=CC(=NC2=C1)C1=CC=CC=C1 | IGF-1R     | GSK2186269A           | COc1cc2CCN(C(=O)CN(C)C)c2cc1Nc1nc(N2CCc3ccccc23)c2cc[nH]c2n1                  | 0.452559 |
| NEU-976 | C[C@@]1(O)C[C@@H](C1)C1=NC(=C2N1C=C N=C2N)C1=CC=C2C=CC(=NC2=C1)C1=CC=CC=C1 | IGF-1R     | GSK1220512A           | COc1cc(ccc1Nc1nc(Nc2ccc(F)cc2C(N)=O)c2cc[nH]c2n1)N1CCN(CC1)C(C)C              | 0.411009 |
| NEU-976 | C[C@@]1(O)C[C@@H](C1)C1=NC(=C2N1C=C N=C2N)C1=CC=C2C=CC(=NC2=C1)C1=CC=CC=C1 | IGF-1R     | GSK2110236A           | COc1cc2CCCN(C(=O)CN(C)C)c2cc1Nc1nc(Nc2ccsc2C(N)=O)c2cc[nH]c2n1                | 0.460436 |
| NEU-976 | C[C@@]1(O)C[C@@H](C1)C1=NC(=C2N1C=C N=C2N)C1=CC=C2C=CC(=NC2=C1)C1=CC=CC=C1 | IGF-1R     | GSK1392956A           | COc1cc(ccc1Nc1nc(Nc2ccc(F)cc2C(=O)N C[C@@H](O)CO)c2cc[nH]c2n1)N1CCN(CC1)C(C)C | 0.430274 |
| NEU-976 | C[C@@]1(O)C[C@@H](C1)C1=NC(=C2N1C=C N=C2N)C1=CC=C2C=CC(=NC2=C1)C1=CC=CC=C1 | IGF-1R     | GSK994854A            | CCCN1CCC=C(C1)c1ccc(Nc2nc(Nc3ccccc3C(N)=O)c3cc[nH]c3n2)c(C)c1                 | 0.394165 |
| NEU-977 | CC[C@H](CO)NC1=NC(NCC2=CC=CC=C2)=C2N=CN(C(C)C)C2=N1                        | CDK1/cyc B | GW778894X             | N#Cc1cccc(Nc2nccc(n2)-c2cnn3ncccc23)c1                                        | 0.301565 |
| NEU-977 | CC[C@H](CO)NC1=NC(NCC2=CC=CC=C2)=C2N=CN(C(C)C)C2=N1                        | CDK1/cyc B | PI_3-K_Inhibitor_VIII | O=S(N(C)/N=C/C1=CN=C2N1C=C(Br)C=C2)(C3=CC([N+][O-])=O)=CC=C3C                 | 0.340731 |



|         |                                                                                                       |            |                       |                                                                            |          |
|---------|-------------------------------------------------------------------------------------------------------|------------|-----------------------|----------------------------------------------------------------------------|----------|
|         |                                                                                                       |            |                       | =O                                                                         |          |
| NEU-977 | CC[C@H](CO)NC1=NC(NCC2=CC=CC=C2)=C2<br>N=CN(C(C)C)C2=N1                                               | CDK1/cyc B | GW779439X             | CN1CCN(CC1)c1ccc(Nc2nccc(n2)-<br>c2cnn3ncccc23)cc1C(F)(F)F                 | 0.340118 |
| NEU-977 | CC[C@H](CO)NC1=NC(NCC2=CC=CC=C2)=C2<br>N=CN(C(C)C)C2=N1                                               | CDK1/cyc B | GW806290X             | C1COc2cc(Nc3nccc(n3)-<br>c3cnn4ncccc34)ccc2O1                              | 0.314777 |
| NEU-978 | NC1=NC(NCCNC2=NC(=C(C=N2)N2C=CN=C2)<br>C2=CC=C(CI)C=C2Cl)=CC=C1N(=O)=O                                | GSK-3b     | GW778894X             | N#Cc1cccc(Nc2nccc(n2)-<br>c2cnn3ncccc23)c1                                 | 0.398459 |
| NEU-978 | NC1=NC(NCCNC2=NC(=C(C=N2)N2C=CN=C2)<br>C2=CC=C(CI)C=C2Cl)=CC=C1N(=O)=O                                | GSK-3b     | PI_3-K_Inhibitor_VIII | O=S(N(C)/N=C/C1=CN=C2N1C=C(Br)<br>C=C2)(C3=CC([N+])([O-])=O)=CC=C3C)<br>=O | 0.392476 |
| NEU-978 | NC1=NC(NCCNC2=NC(=C(C=N2)N2C=CN=C2)<br>C2=CC=C(CI)C=C2Cl)=CC=C1N(=O)=O                                | GSK-3b     | GW779439X             | CN1CCN(CC1)c1ccc(Nc2nccc(n2)-<br>c2cnn3ncccc23)cc1C(F)(F)F                 | 0.444081 |
| NEU-978 | NC1=NC(NCCNC2=NC(=C(C=N2)N2C=CN=C2)<br>C2=CC=C(CI)C=C2Cl)=CC=C1N(=O)=O                                | GSK-3b     | GW806290X             | C1COc2cc(Nc3nccc(n3)-<br>c3cnn4ncccc34)ccc2O1                              | 0.405405 |
| NEU-978 | NC1=NC(NCCNC2=NC(=C(C=N2)N2C=CN=C2)<br>C2=CC=C(CI)C=C2Cl)=CC=C1N(=O)=O                                | GSK-3b     | SB-698596-AC          | CCN1CCC(CC(=O)Nc2n[nH]c3nnc(cc23)-<br>c2cccc(F)c2F)CC1                     | 0.349839 |
| NEU-978 | NC1=NC(NCCNC2=NC(=C(C=N2)N2C=CN=C2)<br>C2=CC=C(CI)C=C2Cl)=CC=C1N(=O)=O                                | GSK-3b     | GW784752X             | COc1cccc(c1)-<br>n1ncc2c(N\N=C\c3ccncc3)ncnc12                             | 0.361549 |
| NEU-978 | NC1=NC(NCCNC2=NC(=C(C=N2)N2C=CN=C2)<br>C2=CC=C(CI)C=C2Cl)=CC=C1N(=O)=O                                | GSK-3b     | SB-686709-A           | CCN1CCC(CC1)C(=O)Nc1n[nH]c2nnc(cc<br>12)-c1cccc(F)c1F                      | 0.355499 |
| NEU-978 | NC1=NC(NCCNC2=NC(=C(C=N2)N2C=CN=C2)<br>C2=CC=C(CI)C=C2Cl)=CC=C1N(=O)=O                                | GSK-3b     | SB-725317             | Oc1ccc(cc1)-<br>c1nc2[nH]nc(NC(=O)C3CC3)c2cc1Br                            | 0.40758  |
| NEU-978 | NC1=NC(NCCNC2=NC(=C(C=N2)N2C=CN=C2)<br>C2=CC=C(CI)C=C2Cl)=CC=C1N(=O)=O                                | GSK-3b     | SB-675259-M           | O=C(Nc1n[nH]c2nnc(cc12)-<br>c1ccnc1)C1CC1                                  | 0.322408 |
| NEU-978 | NC1=NC(NCCNC2=NC(=C(C=N2)N2C=CN=C2)<br>C2=CC=C(CI)C=C2Cl)=CC=C1N(=O)=O                                | GSK-3b     | SB-732881-H           | CN1CCC(CC1)C(=O)Nc1n[nH]c2nc(c(Br)<br>cc12)-c1ccc(O)cc1                    | 0.415796 |
| NEU-978 | NC1=NC(NCCNC2=NC(=C(C=N2)N2C=CN=C2)<br>C2=CC=C(CI)C=C2Cl)=CC=C1N(=O)=O                                | GSK-3b     | SB-678557-A           | CN1CCC(CC1)C(=O)Nc1n[nH]c2nnc(cc1<br>2)-c1cccc1                            | 0.31745  |
| NEU-978 | NC1=NC(NCCNC2=NC(=C(C=N2)N2C=CN=C2)<br>C2=CC=C(CI)C=C2Cl)=CC=C1N(=O)=O                                | GSK-3b     | GW814408X             | COc1cccc(c1)-<br>c1c[nH]c2c(N\N=C\c3ccncc3)ncnc12                          | 0.365176 |
| NEU-978 | NC1=NC(NCCNC2=NC(=C(C=N2)N2C=CN=C2)<br>C2=CC=C(CI)C=C2Cl)=CC=C1N(=O)=O                                | GSK-3b     | SB-732881             | CN1CCC(CC1)C(=O)Nc1n[nH]c2nc(c(Br)<br>cc12)-c1ccc(O)cc1                    | 0.415796 |
| NEU-978 | NC1=NC(NCCNC2=NC(=C(C=N2)N2C=CN=C2)<br>C2=CC=C(CI)C=C2Cl)=CC=C1N(=O)=O                                | GSK-3b     | GW811168X             | COc1cccc(c1)-<br>n1ncc2c(N\N=C\c3ccc(cc3)S(C)(=O)=O)n<br>cnc12             | 0.386701 |
| NEU-979 | CC[C@H]1N(C(C)C)C2=NC(NC3=CC=C(C=C3O<br>C)C(=O)N[C@H]3CC[C@H](CC3)N3CCN(CC4<br>CC4)CC3)=NC=C2N(C)C1=O | PLK1       | GSK2213727A           | COc1cc(C)c(NC(=O)CN(C)C)cc1Nc1nc(N<br>c2cccc(F)c2C(N)=O)c2cc[nH]c2n1       | 0.556368 |
| NEU-979 | CC[C@H]1N(C(C)C)C2=NC(NC3=CC=C(C=C3O<br>C)C(=O)N[C@H]3CC[C@H](CC3)N3CCN(CC4<br>CC4)CC3)=NC=C2N(C)C1=O | PLK1       | GSK2220400A           | CNC(=O)c1ncccc1Nc1nc(Nc2cc3N(CCCc<br>3cc2OC)C(=O)CN(C)C)nc2[nH]ccc12       | 0.598246 |
| NEU-979 | CC[C@H]1N(C(C)C)C2=NC(NC3=CC=C(C=C3O<br>C)C(=O)N[C@H]3CC[C@H](CC3)N3CCN(CC4<br>CC4)CC3)=NC=C2N(C)C1=O | PLK1       | GSK2110236A           | COc1cc2CCCN(C(=O)CN(C)C)c2cc1Nc1<br>nc(Nc2ccsc2C(N)=O)c2cc[nH]c2n1         | 0.600353 |

|         |                                                                                               |      |             |                                                                            |          |
|---------|-----------------------------------------------------------------------------------------------|------|-------------|----------------------------------------------------------------------------|----------|
| NEU-979 | CC[C@H]1N(C(C)C)C2=NC(NC3=CC=C(C=C3O)C(=O)N[C@H]3CC[C@@H](CC3)N3CCN(CC4CC4)CC3)=NC=C2N(C)C1=O | PLK1 | GSK571989A  | C[C@@H](Oc1cc(sc1C(N)=O)-n1cnc2ccc(OCC3CCN(C)CC3)cc12)c1ccc<br>cc1Cl       | 0.490588 |
| NEU-979 | CC[C@H]1N(C(C)C)C2=NC(NC3=CC=C(C=C3O)C(=O)N[C@H]3CC[C@@H](CC3)N3CCN(CC4CC4)CC3)=NC=C2N(C)C1=O | PLK1 | GSK317315A  | COc1ccc2ncn(-c3cc(O[C@H](C)c4ccccc4C(F)(F)F)c(s3)C(N)=O)c2c1               | 0.479107 |
| NEU-979 | CC[C@H]1N(C(C)C)C2=NC(NC3=CC=C(C=C3O)C(=O)N[C@H]3CC[C@@H](CC3)N3CCN(CC4CC4)CC3)=NC=C2N(C)C1=O | PLK1 | GSK237701A  | COc1cc2ncn(-c3cc(O[C@H](C)c4ccccc4Cl)c(s3)C(N)=O)c2cc1OC                   | 0.476    |
| NEU-979 | CC[C@H]1N(C(C)C)C2=NC(NC3=CC=C(C=C3O)C(=O)N[C@H]3CC[C@@H](CC3)N3CCN(CC4CC4)CC3)=NC=C2N(C)C1=O | PLK1 | GSK579289A  | C[C@@H](Oc1cc(sc1C(N)=O)-n1cnc2ccc(OC3CCN(C)CC3)cc12)c1ccc<br>c1Cl         | 0.485747 |
| NEU-979 | CC[C@H]1N(C(C)C)C2=NC(NC3=CC=C(C=C3O)C(=O)N[C@H]3CC[C@@H](CC3)N3CCN(CC4CC4)CC3)=NC=C2N(C)C1=O | PLK1 | GSK317314A  | COc1ccc2ncn(-c3cc(O[C@H](C)c4ccccc4Cl)c(s3)C(N)=O)c2c1                     | 0.470283 |
| NEU-979 | CC[C@H]1N(C(C)C)C2=NC(NC3=CC=C(C=C3O)C(=O)N[C@H]3CC[C@@H](CC3)N3CCN(CC4CC4)CC3)=NC=C2N(C)C1=O | PLK1 | GW852849X   | COc1cc2ncn(-c3cc(OCc4ccccc4Cl)c(s3)C(N)=O)c2cc1O<br>C                      | 0.460023 |
| NEU-979 | CC[C@H]1N(C(C)C)C2=NC(NC3=CC=C(C=C3O)C(=O)N[C@H]3CC[C@@H](CC3)N3CCN(CC4CC4)CC3)=NC=C2N(C)C1=O | PLK1 | GW843682X   | COc1cc2ncn(-c3cc(OCc4ccccc4C(F)(F)F)c(s3)C(N)=O)c2cc1OC                    | 0.467975 |
| NEU-979 | CC[C@H]1N(C(C)C)C2=NC(NC3=CC=C(C=C3O)C(=O)N[C@H]3CC[C@@H](CC3)N3CCN(CC4CC4)CC3)=NC=C2N(C)C1=O | PLK1 | GSK978744A  | C[C@@H](Oc1cc(sc1C(N)=O)-n1cnc2ccc(OC[C@@H](O)CO)cc12)c1cc<br>ccc1Cl       | 0.479977 |
| NEU-979 | CC[C@H]1N(C(C)C)C2=NC(NC3=CC=C(C=C3O)C(=O)N[C@H]3CC[C@@H](CC3)N3CCN(CC4CC4)CC3)=NC=C2N(C)C1=O | PLK1 | GSK326090A  | C[C@@H](Oc1cc(sc1C(N)=O)-n1cnc2ccc(OCC3CCN(C)CC3)cc12)c1ccc<br>cc1C(F)(F)F | 0.496041 |
| NEU-979 | CC[C@H]1N(C(C)C)C2=NC(NC3=CC=C(C=C3O)C(=O)N[C@H]3CC[C@@H](CC3)N3CCN(CC4CC4)CC3)=NC=C2N(C)C1=O | PLK1 | GSK237700A  | COc1cc2ncn(-c3cc(O[C@H](C)c4ccccc4Cl)c(s3)C(N)=O)c2cc1OC                   | 0.476    |
| NEU-979 | CC[C@H]1N(C(C)C)C2=NC(NC3=CC=C(C=C3O)C(=O)N[C@H]3CC[C@@H](CC3)N3CCN(CC4CC4)CC3)=NC=C2N(C)C1=O | PLK1 | GSK312948A  | COc1cc2ncn(-c3cc(OCc4ccccc4)c(s3)C(N)=O)c2cc1OC                            | 0.450844 |
| NEU-979 | CC[C@H]1N(C(C)C)C2=NC(NC3=CC=C(C=C3O)C(=O)N[C@H]3CC[C@@H](CC3)N3CCN(CC4CC4)CC3)=NC=C2N(C)C1=O | PLK1 | GW853606X   | NC(=O)c1sc(cc1OCc1ccccc1Br)-n1cnc2ccc(cc12)C(F)(F)F                        | 0.463912 |
| NEU-979 | CC[C@H]1N(C(C)C)C2=NC(NC3=CC=C(C=C3O)C(=O)N[C@H]3CC[C@@H](CC3)N3CCN(CC4CC4)CC3)=NC=C2N(C)C1=O | PLK1 | GSK1023156A | NC(=O)c1sc(cc1OCc1ccccc1Br)-n1cnc2ccccc12                                  | 0.434524 |
| NEU-980 | CC[C@H]1N(C)C2=C(C=NC(NC3=CC=C(C=C3OC)C(=O)NC3CCN(C)CC3)=N2)N(C)C1=O                          | PLK1 | GSK2213727A | COc1cc(C)c(NC(=O)CN(C)C)cc1Nc1nc(Nc2cccc(F)c2C(N)=O)c2cc[nH]c2n1           | 0.551681 |
| NEU-980 | CC[C@H]1N(C)C2=C(C=NC(NC3=CC=C(C=C3OC)C(=O)NC3CCN(C)CC3)=N2)N(C)C1=O                          | PLK1 | GSK2220400A | CNC(=O)c1ncccc1Nc1nc(Nc2cc3N(CCCc3cc2OC)C(=O)CN(C)C)nc2[nH]ccc12           | 0.588935 |
| NEU-980 | CC[C@H]1N(C)C2=C(C=NC(NC3=CC=C(C=C3OC)C(=O)NC3CCN(C)CC3)=N2)N(C)C1=O                          | PLK1 | GSK2110236A | COc1cc2CCCN(C(=O)CN(C)C)c2cc1Nc1                                           | 0.583433 |

|         |                                                                      |        |             |                                                                           |          |
|---------|----------------------------------------------------------------------|--------|-------------|---------------------------------------------------------------------------|----------|
|         | OC)C(=O)NC3CCN(C)CC3=N2)N(C)C1=O                                     |        |             | nc(Nc2ccsc2C(N)=O)c2cc[nH]c2n1                                            |          |
| NEU-980 | CC[C@H]1N(C)C2=C(C=NC(NC3=CC=C(C=C3OC)C(=O)NC3CCN(C)CC3)=N2)N(C)C1=O | PLK1   | GSK571989A  | C[C@@H](Oc1cc(sc1C(N)=O)-n1cnc2ccc(OC3CCN(C)CC3)cc12)c1ccc<br>cc1Cl       | 0.472014 |
| NEU-980 | CC[C@H]1N(C)C2=C(C=NC(NC3=CC=C(C=C3OC)C(=O)NC3CCN(C)CC3)=N2)N(C)C1=O | PLK1   | GSK317315A  | COc1ccc2ncn(-c3cc(O[C@H](C)c4ccccc4C(F)(F)F)c(s3)C(N)=O)c2c1              | 0.456961 |
| NEU-980 | CC[C@H]1N(C)C2=C(C=NC(NC3=CC=C(C=C3OC)C(=O)NC3CCN(C)CC3)=N2)N(C)C1=O | PLK1   | GSK237701A  | COc1cc2ncn(-c3cc(O[C@H](C)c4ccccc4Cl)c(s3)C(N)=O)c2cc1OC                  | 0.458068 |
| NEU-980 | CC[C@H]1N(C)C2=C(C=NC(NC3=CC=C(C=C3OC)C(=O)NC3CCN(C)CC3)=N2)N(C)C1=O | PLK1   | GSK579289A  | C[C@@H](Oc1cc(sc1C(N)=O)-n1cnc2ccc(OC3CCN(C)CC3)cc12)c1cccc<br>c1Cl       | 0.467975 |
| NEU-980 | CC[C@H]1N(C)C2=C(C=NC(NC3=CC=C(C=C3OC)C(=O)NC3CCN(C)CC3)=N2)N(C)C1=O | PLK1   | GSK317314A  | COc1ccc2ncn(-c3cc(O[C@H](C)c4ccccc4Cl)c(s3)C(N)=O)c2c1                    | 0.452103 |
| NEU-980 | CC[C@H]1N(C)C2=C(C=NC(NC3=CC=C(C=C3OC)C(=O)NC3CCN(C)CC3)=N2)N(C)C1=O | PLK1   | GW852849X   | COc1cc2ncn(-c3cc(OCc4ccccc4Cl)c(s3)C(N)=O)c2cc1OC                         | 0.442488 |
| NEU-980 | CC[C@H]1N(C)C2=C(C=NC(NC3=CC=C(C=C3OC)C(=O)NC3CCN(C)CC3)=N2)N(C)C1=O | PLK1   | GW843682X   | COc1cc2ncn(-c3cc(OCc4ccccc4C(F)(F)F)c(s3)C(N)=O)c2cc1OC                   | 0.448075 |
| NEU-980 | CC[C@H]1N(C)C2=C(C=NC(NC3=CC=C(C=C3OC)C(=O)NC3CCN(C)CC3)=N2)N(C)C1=O | PLK1   | GSK978744A  | C[C@@H](Oc1cc(sc1C(N)=O)-n1cnc2ccc(OC[C@@H](O)CO)cc12)c1ccc<br>cc1Cl      | 0.458694 |
| NEU-980 | CC[C@H]1N(C)C2=C(C=NC(NC3=CC=C(C=C3OC)C(=O)NC3CCN(C)CC3)=N2)N(C)C1=O | PLK1   | GSK326090A  | C[C@@H](Oc1cc(sc1C(N)=O)-n1cnc2ccc(OC3CCN(C)CC3)cc12)c1ccc<br>cc1C(F)(F)F | 0.474315 |
| NEU-980 | CC[C@H]1N(C)C2=C(C=NC(NC3=CC=C(C=C3OC)C(=O)NC3CCN(C)CC3)=N2)N(C)C1=O | PLK1   | GSK237700A  | COc1cc2ncn(-c3cc(O[C@@H](C)c4ccccc4Cl)c(s3)C(N)=O)c2cc1OC                 | 0.458068 |
| NEU-980 | CC[C@H]1N(C)C2=C(C=NC(NC3=CC=C(C=C3OC)C(=O)NC3CCN(C)CC3)=N2)N(C)C1=O | PLK1   | GSK312948A  | COc1cc2ncn(-c3cc(OCc4cccs4)c(s3)C(N)=O)c2cc1OC                            | 0.434808 |
| NEU-980 | CC[C@H]1N(C)C2=C(C=NC(NC3=CC=C(C=C3OC)C(=O)NC3CCN(C)CC3)=N2)N(C)C1=O | PLK1   | GW853606X   | NC(=O)c1sc(cc1OCc1ccccc1Br)-n1cnc2ccc(cc12)C(F)(F)F                       | 0.445492 |
| NEU-980 | CC[C@H]1N(C)C2=C(C=NC(NC3=CC=C(C=C3OC)C(=O)NC3CCN(C)CC3)=N2)N(C)C1=O | PLK1   | GSK1023156A | NC(=O)c1sc(cc1OCc1ccccc1Br)-n1cnc2ccccc12                                 | 0.417874 |
| NEU-981 | CC(C)(C)C1=C(O)C(Br)=CC(C=C(C#N)C#N)=C1                              | IGF-1R | GSK1173862A | CCCN1CCCC(C1)c1ccc(Nc2nc(Nc3cc(F)ccc3C(N)=O)c3cc[nH]c3n2)c(OC)c1          | 0.387378 |
| NEU-981 | CC(C)(C)C1=C(O)C(Br)=CC(C=C(C#N)C#N)=C1                              | IGF-1R | GSK2213727A | COc1cc(C)c(NC(=O)CN(C)C)cc1Nc1nc(Nc2cccc(F)c2C(N)=O)c2cc[nH]c2n1          | 0.386536 |
| NEU-981 | CC(C)(C)C1=C(O)C(Br)=CC(C=C(C#N)C#N)=C1                              | IGF-1R | GSK1326255A | CCCN1CCC(CC1)c1ccc(Nc2nc(Nc3cc(F)ccc3C(N)=O)c3cc[nH]c3n2)c(OC)c1          | 0.389567 |
| NEU-981 | CC(C)(C)C1=C(O)C(Br)=CC(C=C(C#N)C#N)=C1                              | IGF-1R | GSK2163632A | COc1cc2c(cc1Nc1nc(Nc3ccsc3C(N)=O)c                                        | 0.404564 |

|         |                                               |            |                       |                                                                              |          |
|---------|-----------------------------------------------|------------|-----------------------|------------------------------------------------------------------------------|----------|
|         |                                               |            |                       | 3cc[nH]c3n1)N(CCC2(C)C)C(=O)CN(C)C                                           |          |
| NEU-981 | CC(C)(C)C1=C(O)C(Br)=CC(C=C(C#N)C#N)=C1       | IGF-1R     | GSK2220400A           | CNC(=O)c1cccc1Nc1nc(Nc2cc3N(CCCc3cc2OC)C(=O)CN(C)C)nc2[nH]ccc12              | 0.394984 |
| NEU-981 | CC(C)(C)C1=C(O)C(Br)=CC(C=C(C#N)C#N)=C1       | IGF-1R     | GSK2186269A           | COc1cc2CCN(C(=O)CN(C)C)c2cc1Nc1nc(N2CCc3cccc23)c2cc[nH]c2n1                  | 0.393082 |
| NEU-981 | CC(C)(C)C1=C(O)C(Br)=CC(C=C(C#N)C#N)=C1       | IGF-1R     | GSK1220512A           | COc1cc(ccc1Nc1nc(Nc2ccc(F)cc2C(N)=O)c2cc[nH]c2n1)N1CCN(CC1)C(C)C             | 0.375278 |
| NEU-981 | CC(C)(C)C1=C(O)C(Br)=CC(C=C(C#N)C#N)=C1       | IGF-1R     | GSK2110236A           | COc1cc2CCCN(C(=O)CN(C)C)c2cc1Nc1nc(Nc2ccsc2C(N)=O)c2cc[nH]c2n1               | 0.398953 |
| NEU-981 | CC(C)(C)C1=C(O)C(Br)=CC(C=C(C#N)C#N)=C1       | IGF-1R     | GSK1392956A           | COc1cc(ccc1Nc1nc(Nc2ccc(F)cc2C(=O)NC[C@@H](O)CO)c2cc[nH]c2n1)N1CCN(CC1)C(C)C | 0.382863 |
| NEU-981 | CC(C)(C)C1=C(O)C(Br)=CC(C=C(C#N)C#N)=C1       | IGF-1R     | GSK994854A            | CCCN1CCC=C(C1)c1ccc(Nc2nc(Nc3cccc3C(N)=O)c3cc[nH]c3n2)c(C)c1                 | 0.40389  |
| NEU-982 | C1C1=CC=CC(Cl)=C1C(=O)NC1=CN=C1C(=O)NC1CCNCC1 | CDK2/cyc A | GW778894X             | N#Cc1cccc(Nc2nccc(n2)-c2cnn3ncccc23)c1                                       | 0.265042 |
| NEU-982 | C1C1=CC=CC(Cl)=C1C(=O)NC1=CN=C1C(=O)NC1CCNCC1 | CDK2/cyc A | PI_3-K_Inhibitor_VIII | O=S(N(C)/N=C/C1=CN=C2N1C=C(Br)C=C2)(C3=CC([N+]([O-])=O)=CC=C3C)=O            | 0.293754 |
| NEU-982 | C1C1=CC=CC(Cl)=C1C(=O)NC1=CN=C1C(=O)NC1CCNCC1 | CDK2/cyc A | GW779439X             | CN1CCN(CC1)c1ccc(Nc2nccc(n2)-c2cnn3ncccc23)cc1C(F)F                          | 0.308176 |
| NEU-982 | C1C1=CC=CC(Cl)=C1C(=O)NC1=CN=C1C(=O)NC1CCNCC1 | CDK2/cyc A | GW396574X             | CC(C)=Cc1cccc2NC(=O)C(=N/Nc3ccc(cc3)S(N)(=O)=O)c12                           | 0.295422 |
| NEU-982 | C1C1=CC=CC(Cl)=C1C(=O)NC1=CN=C1C(=O)NC1CCNCC1 | CDK2/cyc A | GW290597X             | NS(=O)(=O)c1ccc(N/N=C2/C(=O)Nc3ccc(cc23)C(=O)NCCn2ccnc2)cc1                  | 0.332853 |
| NEU-982 | C1C1=CC=CC(Cl)=C1C(=O)NC1=CN=C1C(=O)NC1CCNCC1 | CDK2/cyc A | GW305178X             | NS(=O)(=O)c1ccc(N/N=C2/C(=O)Nc3ccc4ncccc4c23)cc1                             | 0.303371 |
| NEU-982 | C1C1=CC=CC(Cl)=C1C(=O)NC1=CN=C1C(=O)NC1CCNCC1 | CDK2/cyc A | GW589933X             | NS(=O)(=O)c1ccc(NC=C2C(=O)Nc3ccc4nsc4c23)cc1                                 | 0.319688 |
| NEU-982 | C1C1=CC=CC(Cl)=C1C(=O)NC1=CN=C1C(=O)NC1CCNCC1 | CDK2/cyc A | GW301784X             | CC(C)(CO)CNC(=O)c1ccc2NC(=O)C(=N/Nc3ccc(cc3)S(N)(=O)=O)c2c1                  | 0.335067 |
| NEU-982 | C1C1=CC=CC(Cl)=C1C(=O)NC1=CN=C1C(=O)NC1CCNCC1 | CDK2/cyc A | GW276655X             | NS(=O)(=O)c1ccc(N/N=C2/C(=O)Nc3ccc(cc23)-c2cnc2)cc1                          | 0.312988 |
| NEU-982 | C1C1=CC=CC(Cl)=C1C(=O)NC1=CN=C1C(=O)NC1CCNCC1 | CDK2/cyc A | GW300657X             | NS(=O)(=O)c1ccc(N/N=C2/C(=O)Nc3ccc(cc23)C(=O)NCCc2ccnc2)cc1                  | 0.321694 |
| NEU-982 | C1C1=CC=CC(Cl)=C1C(=O)NC1=CN=C1C(=O)NC1CCNCC1 | CDK2/cyc A | GW297361X             | NS(=O)(=O)c1ccc(N/C=C2/C(=O)Nc3ccc4nsc4c23)cc1                               | 0.319688 |
| NEU-982 | C1C1=CC=CC(Cl)=C1C(=O)NC1=CN=C1C(=O)NC1CCNCC1 | CDK2/cyc A | GW416981X             | CC(C)COC(=O)c1ccc2NC(=O)C(=C/Nc3ccc(cc3)S(N)(=O)=O)c2c1                      | 0.284571 |
| NEU-982 | C1C1=CC=CC(Cl)=C1C(=O)NC1=CN=C1C(=O)NC1CCNCC1 | CDK2/cyc A | GW300660X             | NS(=O)(=O)c1ccc(N/N=C2/C(=O)Nc3ccc(cc23)C(=O)NCCc2c[nH]cn2)cc1               | 0.329718 |
| NEU-982 | C1C1=CC=CC(Cl)=C1C(=O)NC1=CN=C1C(=O)NC1CCNCC1 | CDK2/cyc A | GW810576X             | COc1cccc(Nc2nccc(n2)-c2cnn3ncccc23)c1                                        | 0.252266 |
| NEU-985 | CC(C)N1C(C)=NC=C1C1=CC=NC(NC2=CC=C(           | CDK2/cyc E | GW778894X             | N#Cc1cccc(Nc2nccc(n2)-                                                       | 0.421924 |

|         |                                                         |            |                       |                                                                  |          |
|---------|---------------------------------------------------------|------------|-----------------------|------------------------------------------------------------------|----------|
|         | C=C2)S(C)(=O)=O)=N1                                     |            |                       | c2cnn3ncccc23)c1                                                 |          |
| NEU-985 | CC(C)N1C(C)=NC=C1C1=CC=NC(NC2=CC=C(C=C2)S(C)(=O)=O)=N1  | CDK2/cyc E | PI_3-K_Inhibitor_VIII | O=S(N(C)/N=C/C1=CN=C2N1C=C(Br)C=C2)(C3=CC([N+][O-])=O)=CC=C3C)=O | 0.354041 |
| NEU-985 | CC(C)N1C(C)=NC=C1C1=CC=NC(NC2=CC=C(C=C2)S(C)(=O)=O)=N1  | CDK2/cyc E | GW779439X             | CN1CCN(CC1)c1ccc(Nc2nccc(n2)-c2cnn3ncccc23)cc1C(F)(F)F           | 0.426346 |
| NEU-985 | CC(C)N1C(C)=NC=C1C1=CC=NC(NC2=CC=C(C=C2)S(C)(=O)=O)=N1  | CDK2/cyc E | GW806290X             | C1COc2cc(Nc3nccc(n3)-c3cnn4ncccc34)ccc2O1                        | 0.435312 |
| NEU-985 | CC(C)N1C(C)=NC=C1C1=CC=NC(NC2=CC=C(C=C2)S(C)(=O)=O)=N1  | CDK2/cyc E | GW396574X             | CC(C)=Cc1cccc2NC(=O)C(=N/Nc3ccc(cc3)S(N)(=O)=O)c12               | 0.367647 |
| NEU-985 | CC(C)N1C(C)=NC=C1C1=CC=NC(NC2=CC=C(C=C2)S(C)(=O)=O)=N1  | CDK2/cyc E | GW305178X             | NS(=O)(=O)c1ccc(NN=C2/C(=O)Nc3ccc4ncccc4c23)cc1                  | 0.376033 |
| NEU-985 | CC(C)N1C(C)=NC=C1C1=CC=NC(NC2=CC=C(C=C2)S(C)(=O)=O)=N1  | CDK2/cyc E | GW589933X             | NS(=O)(=O)c1ccc(NC=C2C(=O)Nc3ccc4ncsc4c23)cc1                    | 0.380559 |
| NEU-985 | CC(C)N1C(C)=NC=C1C1=CC=NC(NC2=CC=C(C=C2)S(C)(=O)=O)=N1  | CDK2/cyc E | GW300657X             | NS(=O)(=O)c1ccc(NN=C2/C(=O)Nc3ccc(cc23)C(=O)NCc2ccncc2)cc1       | 0.355681 |
| NEU-985 | CC(C)N1C(C)=NC=C1C1=CC=NC(NC2=CC=C(C=C2)S(C)(=O)=O)=N1  | CDK2/cyc E | GW297361X             | NS(=O)(=O)c1ccc(NC=C2/C(=O)Nc3ccc4ncsc4c23)cc1                   | 0.380559 |
| NEU-985 | CC(C)N1C(C)=NC=C1C1=CC=NC(NC2=CC=C(C=C2)S(C)(=O)=O)=N1  | CDK2/cyc E | GW300660X             | NS(=O)(=O)c1ccc(NN=C2/C(=O)Nc3ccc(cc23)C(=O)NCc2c[nH]cn2)cc1     | 0.358711 |
| NEU-986 | OC1=C(CI)C=C(CC2=C(C(=O)NC2=O)C2=C(C=CC=C2)N(=O)=O)C=C1 | GSK-3b     | GW778894X             | N#Cc1cccc(Nc2nccc(n2)-c2cnn3ncccc23)c1                           | 0.337893 |
| NEU-986 | OC1=C(CI)C=C(CC2=C(C(=O)NC2=O)C2=C(C=CC=C2)N(=O)=O)C=C1 | GSK-3b     | PI_3-K_Inhibitor_VIII | O=S(N(C)/N=C/C1=CN=C2N1C=C(Br)C=C2)(C3=CC([N+][O-])=O)=CC=C3C)=O | 0.394754 |
| NEU-986 | OC1=C(CI)C=C(CC2=C(C(=O)NC2=O)C2=C(C=CC=C2)N(=O)=O)C=C1 | GSK-3b     | GW779439X             | CN1CCN(CC1)c1ccc(Nc2nccc(n2)-c2cnn3ncccc23)cc1C(F)(F)F           | 0.396263 |
| NEU-986 | OC1=C(CI)C=C(CC2=C(C(=O)NC2=O)C2=C(C=CC=C2)N(=O)=O)C=C1 | GSK-3b     | GW806290X             | C1COc2cc(Nc3nccc(n3)-c3cnn4ncccc34)ccc2O1                        | 0.364793 |
| NEU-986 | OC1=C(CI)C=C(CC2=C(C(=O)NC2=O)C2=C(C=CC=C2)N(=O)=O)C=C1 | GSK-3b     | SB-698596-AC          | CCN1CCC(CC(=O)Nc2n[nH]c3nnc(cc23)-c2cccc(F)c2F)CC1               | 0.338101 |
| NEU-986 | OC1=C(CI)C=C(CC2=C(C(=O)NC2=O)C2=C(C=CC=C2)N(=O)=O)C=C1 | GSK-3b     | GW784752X             | COc1cccc(c1)-n1ncc2c(NN=C1c3ccncc3)ncnc12                        | 0.34702  |
| NEU-986 | OC1=C(CI)C=C(CC2=C(C(=O)NC2=O)C2=C(C=CC=C2)N(=O)=O)C=C1 | GSK-3b     | SB-686709-A           | CCN1CCC(CC1)C(=O)Nc1n[nH]c2nnc(cc12)-c1cccc(F)c1F                | 0.339562 |
| NEU-986 | OC1=C(CI)C=C(CC2=C(C(=O)NC2=O)C2=C(C=CC=C2)N(=O)=O)C=C1 | GSK-3b     | SB-725317             | Oc1ccc(cc1)-c1nc2[nH]nc(NC(=O)C3CC3)c2cc1Br                      | 0.365789 |
| NEU-986 | OC1=C(CI)C=C(CC2=C(C(=O)NC2=O)C2=C(C=CC=C2)N(=O)=O)C=C1 | GSK-3b     | SB-675259-M           | O=C(Nc1n[nH]c2nnc(cc12)-c1cccnc1)C1CC1                           | 0.302826 |
| NEU-986 | OC1=C(CI)C=C(CC2=C(C(=O)NC2=O)C2=C(C=CC=C2)N(=O)=O)C=C1 | GSK-3b     | SB-732881-H           | CN1CCC(CC1)C(=O)Nc1n[nH]c2nc(c(Br)cc12)-c1ccc(O)cc1              | 0.380026 |
| NEU-986 | OC1=C(CI)C=C(CC2=C(C(=O)NC2=O)C2=C(C=CC=C2)N(=O)=O)C=C1 | GSK-3b     | SB-678557-A           | CN1CCC(CC1)C(=O)Nc1n[nH]c2nnc(cc12)-c1cccc1                      | 0.31105  |
| NEU-986 | OC1=C(CI)C=C(CC2=C(C(=O)NC2=O)C2=C(C=CC=C2)N(=O)=O)C=C1 | GSK-3b     | GW814408X             | COc1cccc(c1)-                                                    | 0.337398 |

|         |                                                                 |            |                       |                                                                   |          |
|---------|-----------------------------------------------------------------|------------|-----------------------|-------------------------------------------------------------------|----------|
|         | CC=C2)N(=O)=O)C=C1                                              |            |                       | c1c[nH]c2c(N/N=C\c3ccncc3)ncnc12                                  |          |
| NEU-986 | OC1=C(CI)C=C(CC2=C(C(=O)NC2=O)C2=C(C=CC=C2)N(=O)=O)C=C1         | GSK-3b     | SB-732881             | CN1CCC(CC1)C(=O)Nc1n[nH]c2nc(c(Br)cc12)-c1ccc(O)cc1               | 0.380026 |
| NEU-986 | OC1=C(CI)C=C(CC2=C(C(=O)NC2=O)C2=C(C=CC=C2)N(=O)=O)C=C1         | GSK-3b     | GW811168X             | COc1cccc(c1)-n1ncc2c(N/N=C\c3ccc(cc3)S(C)(=O)=O)ncnc12            | 0.371745 |
| NEU-987 | CN1CC[C@@H]([C@H](O)C1)C1=C(O)C=C(O)C2=C1OC(=CC2=O)C1=CC=CC=C1C | CDK1/cyc B | GW778894X             | N#Cc1cccc(Nc2nccc(n2)-c2cnn3ncccc23)c1                            | 0.346926 |
| NEU-987 | CN1CC[C@@H]([C@H](O)C1)C1=C(O)C=C(O)C2=C1OC(=CC2=O)C1=CC=CC=C1C | CDK1/cyc B | PI_3-K_Inhibitor_VIII | O=S(N(C)/N=C/C1=CN=C2N1C=C(Br)C=C2)(C3=CC([N+]([O-])=O)=CC=C3C)=O | 0.388554 |
| NEU-987 | CN1CC[C@@H]([C@H](O)C1)C1=C(O)C=C(O)C2=C1OC(=CC2=O)C1=CC=CC=C1C | CDK1/cyc B | GW779439X             | CN1CCN(CC1)c1ccc(Nc2nccc(n2)-c2cnn3ncccc23)cc1C(F)(F)F            | 0.409594 |
| NEU-987 | CN1CC[C@@H]([C@H](O)C1)C1=C(O)C=C(O)C2=C1OC(=CC2=O)C1=CC=CC=C1C | CDK1/cyc B | GW806290X             | C1COc2cc(Nc3nccc(n3)-c3cnn4ncccc34)ccc2O1                         | 0.372226 |
| NEU-988 | O=C1NC2=C(C=CC=C2)C1=C1\NC2=CC=CC=C2C1=O                        | GSK-3b     | GW778894X             | N#Cc1cccc(Nc2nccc(n2)-c2cnn3ncccc23)c1                            | 0.335387 |
| NEU-988 | O=C1NC2=C(C=CC=C2)C1=C1\NC2=CC=CC=C2C1=O                        | GSK-3b     | PI_3-K_Inhibitor_VIII | O=S(N(C)/N=C/C1=CN=C2N1C=C(Br)C=C2)(C3=CC([N+]([O-])=O)=CC=C3C)=O | 0.353454 |
| NEU-988 | O=C1NC2=C(C=CC=C2)C1=C1\NC2=CC=CC=C2C1=O                        | GSK-3b     | GW779439X             | CN1CCN(CC1)c1ccc(Nc2nccc(n2)-c2cnn3ncccc23)cc1C(F)(F)F            | 0.392144 |
| NEU-988 | O=C1NC2=C(C=CC=C2)C1=C1\NC2=CC=CC=C2C1=O                        | GSK-3b     | GW806290X             | C1COc2cc(Nc3nccc(n3)-c3cnn4ncccc34)ccc2O1                         | 0.348806 |
| NEU-988 | O=C1NC2=C(C=CC=C2)C1=C1\NC2=CC=CC=C2C1=O                        | GSK-3b     | SB-698596-AC          | CCN1CCC(CC(=O)Nc2n[nH]c3nnc(cc23)-c2cccc(F)c2F)CC1                | 0.345347 |
| NEU-988 | O=C1NC2=C(C=CC=C2)C1=C1\NC2=CC=CC=C2C1=O                        | GSK-3b     | GW784752X             | COc1cccc(c1)-n1ncc2c(N/N=C\c3ccncc3)ncnc12                        | 0.326144 |
| NEU-988 | O=C1NC2=C(C=CC=C2)C1=C1\NC2=CC=CC=C2C1=O                        | GSK-3b     | SB-686709-A           | CCN1CCC(CC1)C(=O)Nc1n[nH]c2nnc(cc12)-c1cccc(F)c1F                 | 0.35733  |
| NEU-988 | O=C1NC2=C(C=CC=C2)C1=C1\NC2=CC=CC=C2C1=O                        | GSK-3b     | SB-725317             | Oc1ccc(cc1)-c1nc2[nH]nc(NC(=O)C3CC3)c2cc1Br                       | 0.356254 |
| NEU-988 | O=C1NC2=C(C=CC=C2)C1=C1\NC2=CC=CC=C2C1=O                        | GSK-3b     | SB-675259-M           | O=C(Nc1n[nH]c2nnc(cc12)-c1cccnc1)C1CC1                            | 0.324417 |
| NEU-988 | O=C1NC2=C(C=CC=C2)C1=C1\NC2=CC=CC=C2C1=O                        | GSK-3b     | SB-732881-H           | CN1CCC(CC1)C(=O)Nc1n[nH]c2nc(c(Br)cc12)-c1ccc(O)cc1               | 0.373221 |
| NEU-988 | O=C1NC2=C(C=CC=C2)C1=C1\NC2=CC=CC=C2C1=O                        | GSK-3b     | SB-678557-A           | CN1CCC(CC1)C(=O)Nc1n[nH]c2nnc(cc12)-c1cccc1                       | 0.327562 |
| NEU-988 | O=C1NC2=C(C=CC=C2)C1=C1\NC2=CC=CC=C2C1=O                        | GSK-3b     | GW814408X             | COc1cccc(c1)-c1c[nH]c2c(N/N=C\c3ccncc3)ncnc12                     | 0.32059  |
| NEU-988 | O=C1NC2=C(C=CC=C2)C1=C1\NC2=CC=CC=C2C1=O                        | GSK-3b     | SB-732881             | CN1CCC(CC1)C(=O)Nc1n[nH]c2nc(c(Br)cc12)-c1ccc(O)cc1               | 0.373221 |
| NEU-988 | O=C1NC2=C(C=CC=C2)C1=C1\NC2=CC=CC=C2C1=O                        | GSK-3b     | GW811168X             | COc1cccc(c1)-n1ncc2c(N/N=C\c3ccc(cc3)S(C)(=O)=O)n                 | 0.345711 |

|         |                                                         |        |                       |                                                                  |          |
|---------|---------------------------------------------------------|--------|-----------------------|------------------------------------------------------------------|----------|
|         |                                                         |        |                       | cnc12                                                            |          |
| NEU-989 | NC1=CC=CC(=C1)C1=CC2=C(OC3=CC=CC(O)=C3)N=CN=C2N1        | GSK-3b | GW778894X             | N#Cc1cccc(Nc2nccc(n2)-c2cnn3ncccc23)c1                           | 0.353834 |
| NEU-989 | NC1=CC=CC(=C1)C1=CC2=C(OC3=CC=CC(O)=C3)N=CN=C2N1        | GSK-3b | PI_3-K_Inhibitor_VIII | O=S(N(C)/N=C/C1=CN=C2N1C=C(Br)C=C2)(C3=CC([N+][O-])=O)=CC=C3C)=O | 0.322536 |
| NEU-989 | NC1=CC=CC(=C1)C1=CC2=C(OC3=CC=CC(O)=C3)N=CN=C2N1        | GSK-3b | GW779439X             | CN1CCN(CC1)c1ccc(Nc2nccc(n2)-c2cnn3ncccc23)cc1C(F)(F)F           | 0.362402 |
| NEU-989 | NC1=CC=CC(=C1)C1=CC2=C(OC3=CC=CC(O)=C3)N=CN=C2N1        | GSK-3b | GW806290X             | C1COc2cc(Nc3nccc(n3)-c3cnn4ncccc34)ccc2O1                        | 0.363497 |
| NEU-989 | NC1=CC=CC(=C1)C1=CC2=C(OC3=CC=CC(O)=C3)N=CN=C2N1        | GSK-3b | SB-698596-AC          | CCN1CCC(CC(=O)Nc2n[nH]c3nnc(cc23)-c2cccc(F)c2F)CC1               | 0.368621 |
| NEU-989 | NC1=CC=CC(=C1)C1=CC2=C(OC3=CC=CC(O)=C3)N=CN=C2N1        | GSK-3b | GW784752X             | COc1cccc(c1)-n1ncc2c(N\N=C\c3ccncc3)ncnc12                       | 0.322148 |
| NEU-989 | NC1=CC=CC(=C1)C1=CC2=C(OC3=CC=CC(O)=C3)N=CN=C2N1        | GSK-3b | SB-686709-A           | CCN1CCC(CC1)C(=O)Nc1n[nH]c2nnc(cc12)-c1cccc(F)c1F                | 0.372075 |
| NEU-989 | NC1=CC=CC(=C1)C1=CC2=C(OC3=CC=CC(O)=C3)N=CN=C2N1        | GSK-3b | SB-725317             | Oc1ccc(cc1)-c1nc2[nH]nc(NC(=O)C3CC3)c2cc1Br                      | 0.4213   |
| NEU-989 | NC1=CC=CC(=C1)C1=CC2=C(OC3=CC=CC(O)=C3)N=CN=C2N1        | GSK-3b | SB-675259-M           | O=C(Nc1n[nH]c2nnc(cc12)-c1cccnc1)C1CC1                           | 0.354082 |
| NEU-989 | NC1=CC=CC(=C1)C1=CC2=C(OC3=CC=CC(O)=C3)N=CN=C2N1        | GSK-3b | SB-732881-H           | CN1CCC(CC1)C(=O)Nc1n[nH]c2nc(c(Br)cc12)-c1ccc(O)cc1              | 0.420852 |
| NEU-989 | NC1=CC=CC(=C1)C1=CC2=C(OC3=CC=CC(O)=C3)N=CN=C2N1        | GSK-3b | SB-678557-A           | CN1CCC(CC1)C(=O)Nc1n[nH]c2nnc(cc12)-c1cccc1                      | 0.351505 |
| NEU-989 | NC1=CC=CC(=C1)C1=CC2=C(OC3=CC=CC(O)=C3)N=CN=C2N1        | GSK-3b | GW814408X             | COc1cccc(c1)-c1c[nH]c2c(N\N=C\c3ccncc3)ncnc12                    | 0.371497 |
| NEU-989 | NC1=CC=CC(=C1)C1=CC2=C(OC3=CC=CC(O)=C3)N=CN=C2N1        | GSK-3b | SB-732881             | CN1CCC(CC1)C(=O)Nc1n[nH]c2nc(c(Br)cc12)-c1ccc(O)cc1              | 0.420852 |
| NEU-989 | NC1=CC=CC(=C1)C1=CC2=C(OC3=CC=CC(O)=C3)N=CN=C2N1        | GSK-3b | GW811168X             | COc1cccc(c1)-n1ncc2c(N\N=C\c3ccc(cc3)S(C)(=O)=O)ncnc12           | 0.323297 |
| NEU-990 | CN1C=C(C2=CC=CC=C12)C1=C(C(=O)NC1=O)C1=C(CI)C=C(CI)C=C1 | GSK-3a | GW778894X             | N#Cc1cccc(Nc2nccc(n2)-c2cnn3ncccc23)c1                           | 0.339806 |
| NEU-990 | CN1C=C(C2=CC=CC=C12)C1=C(C(=O)NC1=O)C1=C(CI)C=C(CI)C=C1 | GSK-3a | PI_3-K_Inhibitor_VIII | O=S(N(C)/N=C/C1=CN=C2N1C=C(Br)C=C2)(C3=CC([N+][O-])=O)=CC=C3C)=O | 0.411692 |
| NEU-990 | CN1C=C(C2=CC=CC=C12)C1=C(C(=O)NC1=O)C1=C(CI)C=C(CI)C=C1 | GSK-3a | GW779439X             | CN1CCN(CC1)c1ccc(Nc2nccc(n2)-c2cnn3ncccc23)cc1C(F)(F)F           | 0.401106 |
| NEU-990 | CN1C=C(C2=CC=CC=C12)C1=C(C(=O)NC1=O)C1=C(CI)C=C(CI)C=C1 | GSK-3a | GW806290X             | C1COc2cc(Nc3nccc(n3)-c3cnn4ncccc34)ccc2O1                        | 0.361796 |
| NEU-990 | CN1C=C(C2=CC=CC=C12)C1=C(C(=O)NC1=O)C1=C(CI)C=C(CI)C=C1 | GSK-3a | SB-698596-AC          | CCN1CCC(CC(=O)Nc2n[nH]c3nnc(cc23)-c2cccc(F)c2F)CC1               | 0.379924 |
| NEU-990 | CN1C=C(C2=CC=CC=C12)C1=C(C(=O)NC1=O)C1=C(CI)C=C(CI)C=C1 | GSK-3a | GW784752X             | COc1cccc(c1)-n1ncc2c(N\N=C\c3ccncc3)ncnc12                       | 0.367282 |

|         |                                                         |        |                       |                                                                    |          |
|---------|---------------------------------------------------------|--------|-----------------------|--------------------------------------------------------------------|----------|
| NEU-990 | CN1C=C(C2=CC=CC=C12)C1=C(C(=O)NC1=O)C1=C(CI)C=C(CI)C=C1 | GSK-3a | SB-686709-A           | CCN1CCC(CC1)C(=O)Nc1n[nH]c2nnc(cc12)-c1cccc(F)c1F                  | 0.38447  |
| NEU-990 | CN1C=C(C2=CC=CC=C12)C1=C(C(=O)NC1=O)C1=C(CI)C=C(CI)C=C1 | GSK-3a | SB-725317             | Oc1ccc(cc1)-c1nc2[nH]nc(NC(=O)C3CC3)c2cc1Br                        | 0.373041 |
| NEU-990 | CN1C=C(C2=CC=CC=C12)C1=C(C(=O)NC1=O)C1=C(CI)C=C(CI)C=C1 | GSK-3a | SB-675259-M           | O=C(Nc1n[nH]c2nnc(cc12)-c1cccnc1)C1CC1                             | 0.342502 |
| NEU-990 | CN1C=C(C2=CC=CC=C12)C1=C(C(=O)NC1=O)C1=C(CI)C=C(CI)C=C1 | GSK-3a | SB-732881-H           | CN1CCC(CC1)C(=O)Nc1n[nH]c2nc(c(Br)cc12)-c1ccc(O)cc1                | 0.391682 |
| NEU-990 | CN1C=C(C2=CC=CC=C12)C1=C(C(=O)NC1=O)C1=C(CI)C=C(CI)C=C1 | GSK-3a | SB-678557-A           | CN1CCC(CC1)C(=O)Nc1n[nH]c2nnc(cc12)-c1cccc1                        | 0.340355 |
| NEU-990 | CN1C=C(C2=CC=CC=C12)C1=C(C(=O)NC1=O)C1=C(CI)C=C(CI)C=C1 | GSK-3a | GW814408X             | COc1cccc(c1)-c1c[nH]c2c(N\N=C\c3ccncc3)ncnc12                      | 0.350582 |
| NEU-990 | CN1C=C(C2=CC=CC=C12)C1=C(C(=O)NC1=O)C1=C(CI)C=C(CI)C=C1 | GSK-3a | SB-732881             | CN1CCC(CC1)C(=O)Nc1n[nH]c2nc(c(Br)cc12)-c1ccc(O)cc1                | 0.391682 |
| NEU-990 | CN1C=C(C2=CC=CC=C12)C1=C(C(=O)NC1=O)C1=C(CI)C=C(CI)C=C1 | GSK-3a | GW811168X             | COc1cccc(c1)-n1nc2c(N\N=C\c3ccc(cc3)S(C)(=O)=O)ncnc12              | 0.381219 |
| NEU-990 | CN1C=C(C2=CC=CC=C12)C1=C(C(=O)NC1=O)C1=C(CI)C=C(CI)C=C1 | GSK-3a | GW784307A             | COc1cccc(c1)-n1nc2c(N\N=C\c3ccc(cc3)C(=O)NCCN(C)C)ncnc12           | 0.397286 |
| NEU-991 | O=C1SN(C(=O)N1CC1=CC=CC=C1)C1=C2C=C C=CC2=CC=C1         | GSK-3b | GW778894X             | N#Cc1cccc(Nc2nccc(n2)-c2cnn3ncccc23)c1                             | 0.286136 |
| NEU-991 | O=C1SN(C(=O)N1CC1=CC=CC=C1)C1=C2C=C C=CC2=CC=C1         | GSK-3b | PI_3-K_Inhibitor_VIII | O=S(N(C)/N=C/C1=CN=C2N1C=C(Br)C=C2)(C3=CC([N+])([O-])=O)=CC=C3C)=O | 0.325253 |
| NEU-991 | O=C1SN(C(=O)N1CC1=CC=CC=C1)C1=C2C=C C=CC2=CC=C1         | GSK-3b | GW779439X             | CN1CCN(CC1)c1ccc(Nc2nccc(n2)-c2cnn3ncccc23)cc1C(F)(F)F             | 0.315612 |
| NEU-991 | O=C1SN(C(=O)N1CC1=CC=CC=C1)C1=C2C=C C=CC2=CC=C1         | GSK-3b | GW806290X             | C1COc2cc(Nc3nccc(n3)-c3cnn4ncccc34)ccc2O1                          | 0.290254 |
| NEU-991 | O=C1SN(C(=O)N1CC1=CC=CC=C1)C1=C2C=C C=CC2=CC=C1         | GSK-3b | SB-698596-AC          | CCN1CCC(CC(=O)Nc2n[nH]c3nnc(cc23)-c2cccc(F)c2F)CC1                 | 0.290909 |
| NEU-991 | O=C1SN(C(=O)N1CC1=CC=CC=C1)C1=C2C=C C=CC2=CC=C1         | GSK-3b | GW784752X             | COc1cccc(c1)-n1nc2c(N\N=C\c3ccncc3)ncnc12                          | 0.329927 |
| NEU-991 | O=C1SN(C(=O)N1CC1=CC=CC=C1)C1=C2C=C C=CC2=CC=C1         | GSK-3b | SB-686709-A           | CCN1CCC(CC1)C(=O)Nc1n[nH]c2nnc(cc12)-c1cccc(F)c1F                  | 0.298331 |
| NEU-991 | O=C1SN(C(=O)N1CC1=CC=CC=C1)C1=C2C=C C=CC2=CC=C1         | GSK-3b | SB-725317             | Oc1ccc(cc1)-c1nc2[nH]nc(NC(=O)C3CC3)c2cc1Br                        | 0.318246 |
| NEU-991 | O=C1SN(C(=O)N1CC1=CC=CC=C1)C1=C2C=C C=CC2=CC=C1         | GSK-3b | SB-675259-M           | O=C(Nc1n[nH]c2nnc(cc12)-c1cccnc1)C1CC1                             | 0.275148 |
| NEU-991 | O=C1SN(C(=O)N1CC1=CC=CC=C1)C1=C2C=C C=CC2=CC=C1         | GSK-3b | SB-732881-H           | CN1CCC(CC1)C(=O)Nc1n[nH]c2nc(c(Br)cc12)-c1ccc(O)cc1                | 0.325035 |
| NEU-991 | O=C1SN(C(=O)N1CC1=CC=CC=C1)C1=C2C=C C=CC2=CC=C1         | GSK-3b | SB-678557-A           | CN1CCC(CC1)C(=O)Nc1n[nH]c2nnc(cc12)-c1cccc1                        | 0.270431 |
| NEU-991 | O=C1SN(C(=O)N1CC1=CC=CC=C1)C1=C2C=C C=CC2=CC=C1         | GSK-3b | GW814408X             | COc1cccc(c1)-                                                      | 0.283321 |



|          |                                                                    |            |                       |                                                                                         |          |
|----------|--------------------------------------------------------------------|------------|-----------------------|-----------------------------------------------------------------------------------------|----------|
|          | <chem>C=CC2=CC=C1</chem>                                           |            |                       | <chem>c1c[nH]c2c(N\N=C\c3ccncc3)ncnc12</chem>                                           |          |
| NEU-991  | <chem>O=C1SN(C(=O)N1CC1=CC=CC=C1)C1=C2C=C<br/>C=CC2=CC=C1</chem>   | GSK-3b     | SB-732881             | <chem>CN1CCC(CC1)C(=O)Nc1n[nH]c2nc(c(Br)<br/>cc12)-c1ccc(O)cc1</chem>                   | 0.325035 |
| NEU-991  | <chem>O=C1SN(C(=O)N1CC1=CC=CC=C1)C1=C2C=C<br/>C=CC2=CC=C1</chem>   | GSK-3b     | GW811168X             | <chem>COc1cccc(c1)-<br/>n1ncc2c(N\N=C\c3ccc(cc3)S(C)(=O)=O)n<br/>cnc12</chem>           | 0.344925 |
| NEU-1007 | <chem>CC(C)CC(=O)NC1=NNC2=C1CN(C(=O)C1CCN(<br/>C)CC1)C2(C)C</chem> | CDK2/cyc E | GW778894X             | <chem>N#Cc1cccc(Nc2nccc(n2)-<br/>c2cnn3ncccc23)c1</chem>                                | 0.345419 |
| NEU-1007 | <chem>CC(C)CC(=O)NC1=NNC2=C1CN(C(=O)C1CCN(<br/>C)CC1)C2(C)C</chem> | CDK2/cyc E | PI_3-K_Inhibitor_VIII | <chem>O=S(N(C)/N=C/C1=CN=C2N1C=C(Br)<br/>C=C2)(C3=CC([N+][O-])=O)=CC=C3C)<br/>=O</chem> | 0.399876 |
| NEU-1007 | <chem>CC(C)CC(=O)NC1=NNC2=C1CN(C(=O)C1CCN(<br/>C)CC1)C2(C)C</chem> | CDK2/cyc E | GW779439X             | <chem>CN1CCN(CC1)c1ccc(Nc2nccc(n2)-<br/>c2cnn3ncccc23)cc1C(F)(F)F</chem>                | 0.410144 |
| NEU-1007 | <chem>CC(C)CC(=O)NC1=NNC2=C1CN(C(=O)C1CCN(<br/>C)CC1)C2(C)C</chem> | CDK2/cyc E | GW806290X             | <chem>C1COc2cc(Nc3nccc(n3)-<br/>c3cnn4ncccc34)ccc2O1</chem>                             | 0.367675 |
| NEU-1007 | <chem>CC(C)CC(=O)NC1=NNC2=C1CN(C(=O)C1CCN(<br/>C)CC1)C2(C)C</chem> | CDK2/cyc E | GW396574X             | <chem>CC(C)=Cc1cccc2NC(=O)\C(=N/Nc3ccc(cc<br/>3)S(N)(=O)=O)c12</chem>                   | 0.404487 |
| NEU-1007 | <chem>CC(C)CC(=O)NC1=NNC2=C1CN(C(=O)C1CCN(<br/>C)CC1)C2(C)C</chem> | CDK2/cyc E | GW305178X             | <chem>NS(=O)(=O)c1ccc(N\N=C2/C(=O)Nc3ccc<br/>4ncccc4c23)cc1</chem>                      | 0.407174 |
| NEU-1007 | <chem>CC(C)CC(=O)NC1=NNC2=C1CN(C(=O)C1CCN(<br/>C)CC1)C2(C)C</chem> | CDK2/cyc E | GW589933X             | <chem>NS(=O)(=O)c1ccc(NC=C2C(=O)Nc3ccc4<br/>ncsc4c23)cc1</chem>                         | 0.414906 |
| NEU-1007 | <chem>CC(C)CC(=O)NC1=NNC2=C1CN(C(=O)C1CCN(<br/>C)CC1)C2(C)C</chem> | CDK2/cyc E | GW300657X             | <chem>NS(=O)(=O)c1ccc(N\N=C2/C(=O)Nc3ccc(<br/>cc23)C(=O)NCc2ccncc2)cc1</chem>           | 0.392005 |
| NEU-1007 | <chem>CC(C)CC(=O)NC1=NNC2=C1CN(C(=O)C1CCN(<br/>C)CC1)C2(C)C</chem> | CDK2/cyc E | GW297361X             | <chem>NS(=O)(=O)c1ccc(N\C=C2/C(=O)Nc3ccc<br/>4ncsc4c23)cc1</chem>                       | 0.414906 |
| NEU-1007 | <chem>CC(C)CC(=O)NC1=NNC2=C1CN(C(=O)C1CCN(<br/>C)CC1)C2(C)C</chem> | CDK2/cyc E | GW300660X             | <chem>NS(=O)(=O)c1ccc(N\N=C2/C(=O)Nc3ccc(<br/>cc23)C(=O)NCc2c[nH]cn2)cc1</chem>         | 0.416082 |
| NEU-1049 | <chem>COC1=CC2=C(C=C1)C1=C(N2)C(C)=NC=C1</chem>                    | DYRK1B     | GSK1173862A           | <chem>CCCN1CCCC(C1)c1ccc(Nc2nc(Nc3cc(F)<br/>ccc3C(N)=O)c3cc[nH]c3n2)c(OC)c1</chem>      | 0.424731 |
| NEU-1049 | <chem>COC1=CC2=C(C=C1)C1=C(N2)C(C)=NC=C1</chem>                    | DYRK1B     | GW778894X             | <chem>N#Cc1cccc(Nc2nccc(n2)-<br/>c2cnn3ncccc23)c1</chem>                                | 0.403681 |
| NEU-1049 | <chem>COC1=CC2=C(C=C1)C1=C(N2)C(C)=NC=C1</chem>                    | DYRK1B     | PI_3-K_Inhibitor_VIII | <chem>O=S(N(C)/N=C/C1=CN=C2N1C=C(Br)<br/>C=C2)(C3=CC([N+][O-])=O)=CC=C3C)<br/>=O</chem> | 0.430839 |
| NEU-1049 | <chem>COC1=CC2=C(C=C1)C1=C(N2)C(C)=NC=C1</chem>                    | DYRK1B     | GW779439X             | <chem>CN1CCN(CC1)c1ccc(Nc2nccc(n2)-<br/>c2cnn3ncccc23)cc1C(F)(F)F</chem>                | 0.435576 |
| NEU-1049 | <chem>COC1=CC2=C(C=C1)C1=C(N2)C(C)=NC=C1</chem>                    | DYRK1B     | GW806290X             | <chem>C1COc2cc(Nc3nccc(n3)-<br/>c3cnn4ncccc34)ccc2O1</chem>                             | 0.412941 |
| NEU-1049 | <chem>COC1=CC2=C(C=C1)C1=C(N2)C(C)=NC=C1</chem>                    | DYRK1B     | GW810576X             | <chem>COc1cccc(Nc2nccc(n2)-<br/>c2cnn3ncccc23)c1</chem>                                 | 0.407862 |
| NEU-1049 | <chem>COC1=CC2=C(C=C1)C1=C(N2)C(C)=NC=C1</chem>                    | DYRK1B     | 5-Iodotubercidin      | <chem>C1=C(C2=C(N1C3C(C(C(O3)CO)O)O)N=<br/>CN=C2N)I</chem>                              | 0.425439 |
| NEU-1049 | <chem>COC1=CC2=C(C=C1)C1=C(N2)C(C)=NC=C1</chem>                    | DYRK1B     | GW801372X             | <chem>COc1cc(Nc2nccc(n2)-<br/>c2cnn3ncccc23)cc(OC)c1</chem>                             | 0.410475 |

**Figure S1.** Contingency table analysis

|                             |                                                                                 | Human kinase % inhibition                                                                                                                                                     |                                                                                                                                                                               |                                                                                          |
|-----------------------------|---------------------------------------------------------------------------------|-------------------------------------------------------------------------------------------------------------------------------------------------------------------------------|-------------------------------------------------------------------------------------------------------------------------------------------------------------------------------|------------------------------------------------------------------------------------------|
|                             |                                                                                 | Active<br>( $\geq 70$ %inh/0.1 $\mu$ M)                                                                                                                                       | Inactive<br>( $< 70$ %inh/0.1 $\mu$ M)                                                                                                                                        |                                                                                          |
| T. brucei pEC <sub>50</sub> | Higher<br>( $\geq$ cutoff)                                                      | <b>T. brucei (+)<br/>Kinase (+)</b><br>Number of compounds with T. brucei pEC <sub>50</sub> and Human kinase % of inhibition above the two cut-off ( <b>A</b> )               | <b>T. brucei (+)<br/>Kinase (-)</b><br>Number of compounds with T. brucei pEC <sub>50</sub> above the cut-off and Human kinase % of inhibition below the cut-off ( <b>B</b> ) | Sum of compounds with T. Brucei pIC <sub>50</sub> above the cut-off ( <b>G</b> ) (G=A+B) |
|                             | Lower<br>( $<$ cutoff)                                                          | <b>T. brucei (-)<br/>Kinase (+)</b><br>Number of compounds with T. brucei pEC <sub>50</sub> below the cut-off and Human kinase % of inhibition above the cut-off ( <b>C</b> ) | <b>T. brucei (-)<br/>Kinase (-)</b><br>Number of compounds with T. brucei pEC <sub>50</sub> and Human kinase % of inhibition below the two cut-off ( <b>D</b> )               | Sum of compounds with T. Brucei pIC <sub>50</sub> below the cut-off ( <b>H</b> ) (H=C+D) |
|                             | Sum of compounds with activity above the considered kinase ( <b>E</b> ) (E=A+C) |                                                                                                                                                                               | Sum of compounds with activity below the considered kinase ( <b>F</b> ) (F=B+D)                                                                                               |                                                                                          |

**Figure S2.** “Preferred” human kinase inhibitors that are enriched for activity against *T. brucei* are not enriched against *Leishmania major* (A) amastigotes or (B) promastigotes; (C) *T. cruzi*; or (D) *Plasmodium falciparum*.

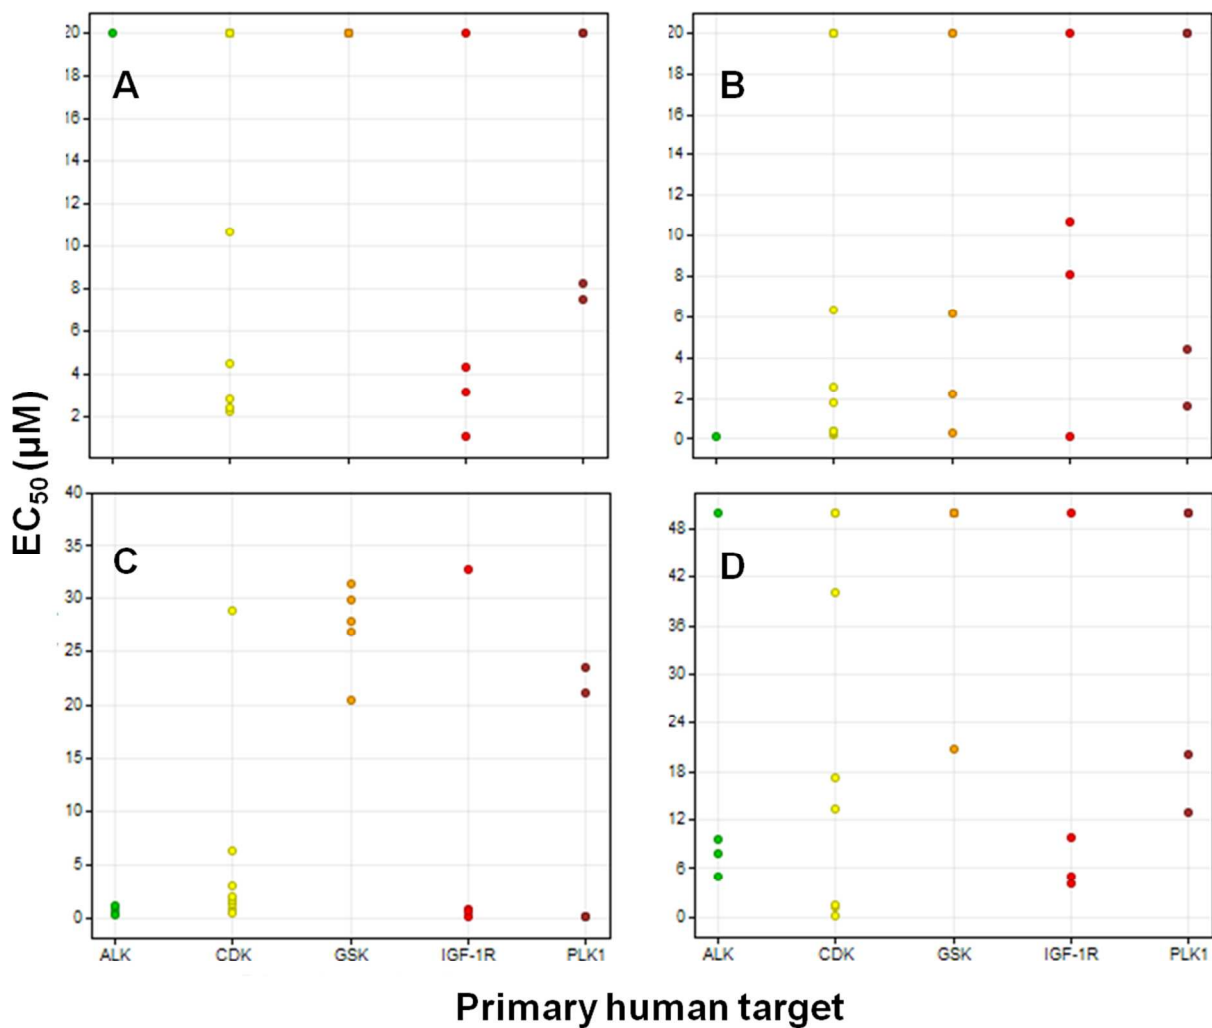

**Example contingency table analysis.** We describe here a contingency table analysis, exemplified by that performed on the human kinase DYRK1B. In this case, we have six compounds with a % inhibition of DYRK1B  $\geq 70\%$  (the definition of “Active” compounds against the human kinase), and these six compounds also show a *T. brucei*  $pEC_{50} \geq 6$  (The definition of “Active” compounds against *T. brucei*.) The table below represents the contingency table for DYRK1B for the full set of compounds in Table 1. Note that 1 was added to each compound count in order to avoid zeros in any quadrant, which would provide a null ratio.

**Figure S3.** Contingency table analysis for DYRK1B.

|                             |          | DYRK1B % inhibition                             |                                                          | Total |
|-----------------------------|----------|-------------------------------------------------|----------------------------------------------------------|-------|
|                             |          | Active                                          | Inactive                                                 |       |
| <i>T. brucei</i> $pEC_{50}$ | Active   | <i>T. brucei</i> (+)<br>DYRK1B (+)<br><br>6+1=7 | <i>T. brucei</i> (+)<br>DYRK1B (-)<br><br>53-(6+1)=46    | 53    |
|                             | Inactive | <i>T. brucei</i> (-)<br>DYRK1B (+)<br><br>0+1=1 | <i>T. brucei</i> (-)<br>DYRK1B (-)<br><br>365-(53-1)=311 | 312   |
| Total                       |          | 8                                               | 357                                                      | 365   |

On this table we calculate two conditional probabilities

- $Pct1 = (TB^+ - kinase^+) / (TB^+ - kinase^+) + (TB^+ - kinase^-)$   
 $= (7) / (7) + 46 = 0.13207547$
- $Pct2 = (TB^- - kinase^+) / (TB^- - kinase^+) + (TB^- - kinase^-)$   
 $= (1) / (1) + (311) = 0.003205128$

And the ratio and enrichment can be calculated:

- Ratio =  $Pct1 / pct2$
- Ratio =  $0.13207547 / 0.003205128 = 41.2075472$

| TB <sup>+</sup> kinase <sup>+</sup> | TB <sup>+</sup> kinase <sup>-</sup> | TB <sup>-</sup> kinase <sup>+</sup> | TB <sup>-</sup> kinase <sup>-</sup> | pct1       | pct2       | Ratio      | v.chisq               |
|-------------------------------------|-------------------------------------|-------------------------------------|-------------------------------------|------------|------------|------------|-----------------------|
| 7                                   | 46                                  | 1                                   | 311                                 | 0.13207547 | 0.00320513 | 41.2075472 | $6.06 \times 10^{-8}$ |

Finally, *p*-values (chi-squared test) were calculated using R.

**Figure S4.** Plot of *T. brucei* pEC<sub>50</sub> versus human kinase pIC<sub>50</sub> for two preferred human kinases (IGF1R and GSK3β), and two non-preferred human kinases (TIE2 and DDR2) using non-PKIS GSK compounds. The p-value for the linear regression is shown as a statistical test for association between the *T. brucei* and human kinase activity. Only GSK3b and IGF1R give statistically significant correlations.

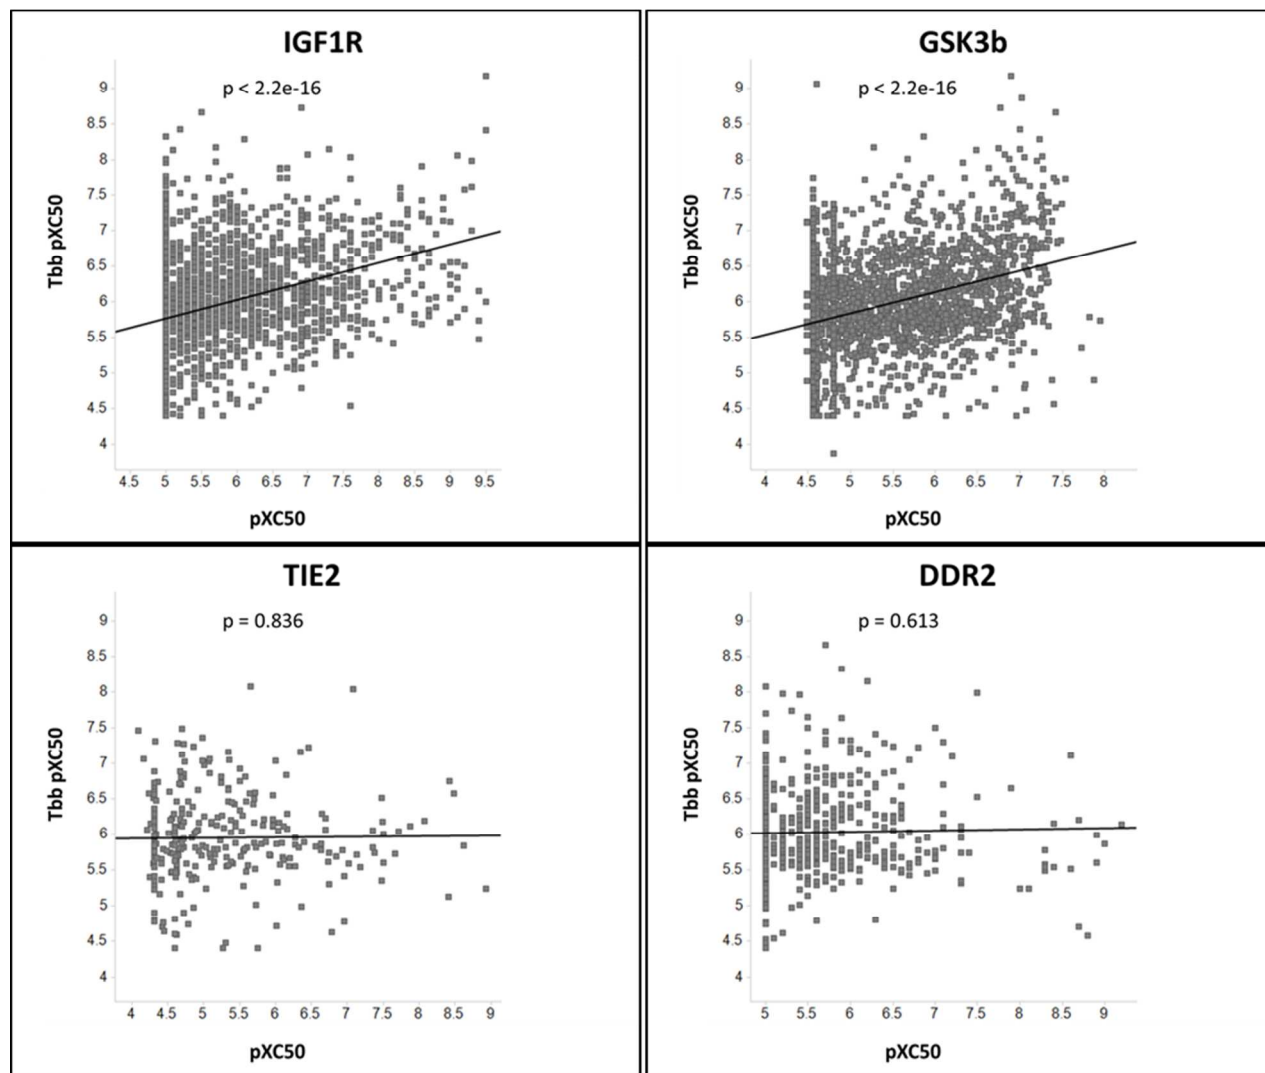

## References

1. Zou, H. Y.; Li, Q.; Lee, J. H.; Arango, M. E.; McDonnell, S. R.; Yamazaki, S.; Koudriakova, T. B.; Alton, G.; Cui, J. J.; Kung, P. P.; Nambu, M. D.; Los, G.; Bender, S. L.; Mroczkowski, B.; Christensen, J. G. An orally available small-molecule inhibitor of c-Met, PF-2341066, exhibits cytoreductive antitumor efficacy through antiproliferative and antiangiogenic mechanisms. *Cancer Res.* **2007**, *67*, 4408-4417.
2. Galkin, A. V.; Melnick, J. S.; Kim, S.; Hood, T. L.; Li, N.; Li, L.; Xia, G.; Steensma, R.; Chopiuk, G.; Jiang, J.; Wan, Y.; Ding, P.; Liu, Y.; Sun, F.; Schultz, P. G.; Gray, N. S.; Warmuth, M. Identification of NVP-TAE684, a potent, selective, and efficacious inhibitor of NPM-ALK. *Proc. Natl. Acad. Sci. USA* **2007**, *104*, 270-275.
3. Sabbatini, P.; Korenchuk, S.; Rowand, J. L.; Groy, A.; Liu, Q.; Leperi, D.; Atkins, C.; Dumble, M.; Yang, J.; Anderson, K.; Kruger, R. G.; Gontarek, R. R.; Maksimchuk, K. R.; Suravajjala, S.; Lapiere, R. R.; Shotwell, J. B.; Wilson, J. W.; Chamberlain, S. D.; Rabindran, S. K.; Kumar, R. GSK1838705A inhibits the insulin-like growth factor-1 receptor and anaplastic lymphoma kinase and shows antitumor activity in experimental models of human cancers. *Mol. Cancer Ther.* **2009**, *8*, 2811-2820.
4. Garcia-Echeverria, C.; Pearson, M. A.; Marti, A.; Meyer, T.; Mestan, J.; Zimmermann, J.; Gao, J.; Brueggen, J.; Capraro, H. G.; Cozens, R.; Evans, D. B.; Fabbro, D.; Furet, P.; Porta, D. G.; Liebetanz, J.; Martiny-Baron, G.; Ruetz, S.; Hofmann, F. In vivo antitumor activity of NVP-AEW541-A novel, potent, and selective inhibitor of the IGF-IR kinase. *Cancer cell* **2004**, *5*, 231-239.
5. Misra, R. N.; Xiao, H.; Rawlins, D. B.; Shan, W.; Kellar, K. A.; Mulheron, J. G.; Sack, J. S.; Tokarski, J. S.; Kimball, S. D.; Webster, K. R. 1H-Pyrazolo[3,4-b]pyridine inhibitors of cyclin-dependent kinases: highly potent 2,6-Difluorophenacyl analogues. *Bioorg. Med. Chem. Lett.* **2003**, *13*, 2405-2408.
6. Brasca, M. G.; Amboldi, N.; Ballinari, D.; Cameron, A.; Casale, E.; Cervi, G.; Colombo, M.; Colotta, F.; Croci, V.; D'Alessio, R.; Fiorentini, F.; Isacchi, A.; Mercurio, C.; Moretti, W.; Panzeri, A.; Pastori, W.; Pevarello, P.; Quartieri, F.; Roletto, F.; Traquandi, G.; Vianello, P.; Vulpetti, A.; Ciomei, M. Identification of N,1,4,4-tetramethyl-8-[[4-(4-methylpiperazin-1-yl)phenyl]amino]-4,5-dihydro-1H-pyrazolo[4,3-h]quinazoline-3-carboxamide (PHA-848125), a potent, orally available cyclin dependent kinase inhibitor. *J. Med. Chem.* **2009**, *52*, 5152-5163.
7. Sabbatini, P.; Rowand, J. L.; Groy, A.; Korenchuk, S.; Liu, Q.; Atkins, C.; Dumble, M.; Yang, J.; Anderson, K.; Wilson, B. J.; Emmitte, K. A.; Rabindran, S. K.; Kumar, R. Antitumor activity of GSK1904529A, a small-molecule inhibitor of the insulin-like growth factor-I receptor tyrosine kinase. *Clin. Cancer Res.* **2009**, *15*, 3058-3067.
8. Emanuel, S.; Rugg, C. A.; Gruninger, R. H.; Lin, R.; Fuentes-Pesquera, A.; Connolly, P. J.; Wetter, S. K.; Hollister, B.; Kruger, W. W.; Napier, C.; Jolliffe, L.; Middleton, S. A. The in vitro and in vivo effects of JNJ-7706621: a dual inhibitor of cyclin-dependent kinases and aurora kinases. *Cancer Res.* **2005**, *65*, 9038-9046.
9. Gumireddy, K.; Reddy, M. V.; Cosenza, S. C.; Boominathan, R.; Baker, S. J.; Papathi, N.; Jiang, J.; Holland, J.; Reddy, E. P. ON01910, a non-ATP-competitive small molecule inhibitor of Plk1, is a potent anticancer agent. *Cancer cell* **2005**, *7*, 275-286.
10. Sakamoto, H.; Tsukaguchi, T.; Hiroshima, S.; Kodama, T.; Kobayashi, T.; Fukami, T. A.; Oikawa, N.; Tsukuda, T.; Ishii, N.; Aoki, Y. CH5424802, a selective ALK inhibitor capable of blocking the resistant gatekeeper mutant. *Cancer cell* **2011**, *19*, 679-690.
11. Parry, D.; Guzi, T.; Shanahan, F.; Davis, N.; Prabhavalkar, D.; Wiswell, D.; Seghezzi, W.; Paruch, K.; Dwyer, M. P.; Doll, R.; Nomeir, A.; Windsor, W.; Fischmann, T.; Wang, Y.; Oft, M.; Chen, T.; Kirschmeier, P.; Lees, E. M. Dinaciclib (SCH 727965), a novel and potent cyclin-dependent kinase inhibitor. *Mol. Cancer Ther.* **2010**, *9*, 2344-2353.
12. Mulvihill, M. J.; Cooke, A.; Rosenfeld-Franklin, M.; Buck, E.; Foreman, K.; Landfair, D.; O'Connor, M.; Pirritt, C.; Sun, Y.; Yao, Y.; Arnold, L. D.; Gibson, N. W.; Ji, Q. S. Discovery of

OSI-906: a selective and orally efficacious dual inhibitor of the IGF-1 receptor and insulin receptor. *Future Med. Chem.* **2009**, *1*, 1153-1171.

13. Meijer, L.; Borgne, A.; Mulner, O.; Chong, J. P.; Blow, J. J.; Inagaki, N.; Inagaki, M.; Delcros, J. G.; Moulinoux, J. P. Biochemical and cellular effects of roscovitine, a potent and selective inhibitor of the cyclin-dependent kinases cdc2, cdk2 and cdk5. *Eur. J. Biochem.* **1997**, *243*, 527-536.

14. Ring, D. B.; Johnson, K. W.; Henriksen, E. J.; Nuss, J. M.; Goff, D.; Kinnick, T. R.; Ma, S. T.; Reeder, J. W.; Samuels, I.; Slabiak, T.; Wagman, A. S.; Hammond, M. E.; Harrison, S. D. Selective glycogen synthase kinase 3 inhibitors potentiate insulin activation of glucose transport and utilization in vitro and in vivo. *Diabetes* **2003**, *52*, 588-595.

15. Rudolph, D.; Steegmaier, M.; Hoffmann, M.; Grauert, M.; Baum, A.; Quant, J.; Haslinger, C.; Garin-Chesa, P.; Adolf, G. R. BI 6727, a Polo-like kinase inhibitor with improved pharmacokinetic profile and broad antitumor activity. *Clin. Cancer Res.* **2009**, *15*, 3094-3102.

16. Steegmaier, M.; Hoffmann, M.; Baum, A.; Lenart, P.; Petronczki, M.; Krssak, M.; Gurtler, U.; Garin-Chesa, P.; Lieb, S.; Quant, J.; Grauert, M.; Adolf, G. R.; Kraut, N.; Peters, J. M.; Rettig, W. J. BI 2536, a potent and selective inhibitor of polo-like kinase 1, inhibits tumor growth in vivo. *Current biology : CB* **2007**, *17*, 316-322.

17. Squires, M. S.; Feltell, R. E.; Wallis, N. G.; Lewis, E. J.; Smith, D. M.; Cross, D. M.; Lyons, J. F.; Thompson, N. T. Biological characterization of AT7519, a small-molecule inhibitor of cyclin-dependent kinases, in human tumor cell lines. *Mol. Cancer Ther.* **2009**, *8*, 324-332.

18. Chen, R.; Wierda, W. G.; Chubb, S.; Hawtin, R. E.; Fox, J. A.; Keating, M. J.; Gandhi, V.; Plunkett, W. Mechanism of action of SNS-032, a novel cyclin-dependent kinase inhibitor, in chronic lymphocytic leukemia. *Blood* **2009**, *113*, 4637-4645.

19. Conroy, A.; Stockett, D. E.; Walker, D.; Arkin, M. R.; Hoch, U.; Fox, J. A.; Hawtin, R. E. SNS-032 is a potent and selective CDK 2, 7 and 9 inhibitor that drives target modulation in patient samples. *Cancer Chemother. Pharmacol.* **2009**, *64*, 723-732.

20. Byth, K. F.; Thomas, A.; Hughes, G.; Forder, C.; McGregor, A.; Geh, C.; Oakes, S.; Green, C.; Walker, M.; Newcombe, N.; Green, S.; Growcott, J.; Barker, A.; Wilkinson, R. W. AZD5438, a potent oral inhibitor of cyclin-dependent kinases 1, 2, and 9, leads to pharmacodynamic changes and potent antitumor effects in human tumor xenografts. *Mol. Cancer Ther.* **2009**, *8*, 1856-1866.

21. Coghlan, M. P.; Culbert, A. A.; Cross, D. A.; Corcoran, S. L.; Yates, J. W.; Pearce, N. J.; Rausch, O. L.; Murphy, G. J.; Carter, P. S.; Roxbee Cox, L.; Mills, D.; Brown, M. J.; Haigh, D.; Ward, R. W.; Smith, D. G.; Murray, K. J.; Reith, A. D.; Holder, J. C. Selective small molecule inhibitors of glycogen synthase kinase-3 modulate glycogen metabolism and gene transcription. *Chem. Biol.* **2000**, *7*, 793-803.

22. Senderowicz, A. M. The cell cycle as a target for cancer therapy: basic and clinical findings with the small molecule inhibitors flavopiridol and UCN-01. *The oncologist* **2002**, *7 Suppl 3*, 12-19.

23. Ding, S.; Wu, T. Y.; Brinker, A.; Peters, E. C.; Hur, W.; Gray, N. S.; Schultz, P. G. Synthetic small molecules that control stem cell fate. *Proc. Natl. Acad. Sci. USA* **2003**, *100*, 7632-7637.

24. Dominguez, J. M.; Fuertes, A.; Orozco, L.; del Monte-Millan, M.; Delgado, E.; Medina, M. Evidence for irreversible inhibition of glycogen synthase kinase-3beta by tideglusib. *J. Biol. Chem.* **2012**, *287*, 893-904.

25. Brasca, M. G.; Albanese, C.; Alzani, R.; Amici, R.; Avanzi, N.; Ballinari, D.; Bischoff, J.; Borghi, D.; Casale, E.; Croci, V.; Fiorentini, F.; Isacchi, A.; Mercurio, C.; Nesi, M.; Orsini, P.; Pastori, W.; Pesenti, E.; Pevarello, P.; Roussel, P.; Varasi, M.; Volpi, D.; Vulpetti, A.; Ciomei, M. Optimization of 6,6-dimethyl pyrrolo[3,4-c]pyrazoles: Identification of PHA-793887, a potent CDK inhibitor suitable for intravenous dosing. *Bioorg. Med. Chem.* **2010**, *18*, 1844-1853.

26. Tahtouh, T.; Elkins, J. M.; Filippakopoulos, P.; Soundararajan, M.; Burgy, G.; Durieu, E.; Cochet, C.; Schmid, R. S.; Lo, D. C.; Delhommel, F.; Oberholzer, A. E.; Pearl, L. H.; Carreaux, F.; Bazureau, J. P.; Knapp, S.; Meijer, L. Selectivity, cocrystal structures, and neuroprotective properties of leucettines, a family of protein kinase inhibitors derived from the marine sponge alkaloid leucettamine B. *J. Med. Chem.* **2012**, *55*, 9312-9330.
